# Supplementary material
Source: MDPI journal article supplement (https://www.mdpi.com/2673-9917/2/4/36)
Supplement: s1 [file s1]

**Table S1:** Presence on the different sampled substrates of the 208 taxa used in the statistical analysis.

| Taxa/Substrates                                            | Algae | Eelgrass | Algae on rock | Rock | Sediment | Sand | Barnacle | Shell | Wood | Metal | Styrofoam |
|------------------------------------------------------------|-------|----------|---------------|------|----------|------|----------|-------|------|-------|-----------|
| <i>Achnanthes brevipes</i> var. <i>intermedia</i>          | x     |          | x             | x    |          |      | x        | x     | x    | x     |           |
| <i>Achnanthes brevipes</i> var. <i>intermedia</i> shape 2  |       |          |               | x    |          |      |          |       |      |       |           |
| <i>Achnanthes</i> cf. <i>kuwaitensis</i>                   | x     |          | x             | x    |          |      | x        | x     | x    |       | x         |
| <i>Achnanthes</i> cf. <i>kuwaitensis</i> shape 2           | x     |          |               | x    |          |      |          |       |      |       |           |
| <i>Achnanthes</i> cf. <i>punctulata</i>                    |       | x        |               |      |          |      | x        | x     |      |       |           |
| <i>Achnanthes</i> cf. <i>ricula</i>                        | x     |          |               | x    | x        | x    |          | x     | x    |       | x         |
| <i>Achnanthes delicatula</i> subsp. <i>septentrionalis</i> |       |          |               | x    | x        |      |          |       |      |       | x         |
| <i>Achnanthes minuscula</i>                                | x     | x        | x             | x    | x        | x    | x        | x     |      |       |           |
| <i>Achnanthes nitidiformis</i>                             |       |          |               | x    |          |      |          | x     |      |       |           |
| <i>Achnanthes</i> sp. 23                                   |       |          |               |      | x        |      |          | x     |      |       | x         |
| <i>Achnanthes</i> sp. 61                                   | x     |          |               | x    |          | x    | x        | x     | x    |       |           |
| <i>Achnanthes</i> sp. 67                                   | x     | x        |               |      |          | x    |          |       |      |       |           |
| <i>Achnanthes</i> sp. 76                                   |       |          |               |      | x        | x    |          |       |      |       |           |
| <i>Achnanthidium minutissimum</i>                          |       |          |               | x    |          |      | x        |       |      |       |           |
| <i>Amphora</i> cf. <i>inariensis</i>                       |       | x        |               |      |          |      |          |       |      |       |           |
| <i>Amphora holsatica</i>                                   |       |          |               | x    |          |      |          |       |      |       |           |
| <i>Amphora</i> sp. 12                                      |       |          |               |      |          |      |          | x     |      |       |           |
| <i>Amphora</i> sp. 7                                       |       |          |               |      |          |      |          | x     |      |       |           |

|                                                          |   |   |   |   |   |   |   |   |   |   |   |
|----------------------------------------------------------|---|---|---|---|---|---|---|---|---|---|---|
| <i>Amphora</i> sp. 8                                     |   |   |   | x | x | x |   | x |   |   |   |
| <i>Astartiella bremeyeri</i>                             | x |   |   | x | x |   |   |   | x |   | x |
| <i>Astartiella</i> sp. 149                               | x | x |   |   | x | x |   | x |   |   |   |
| <i>Aulacoseira</i> sp. 2                                 |   |   |   | x |   |   |   |   |   |   |   |
| <i>Aulacoseira</i> sp. 3                                 |   |   |   | x |   |   |   | x |   |   |   |
| <i>Bacillaria paxillifera</i>                            | x |   |   |   |   |   |   | x |   | x |   |
| <i>Berkeleya rutilans</i>                                |   | x | x | x | x |   | x | x | x | x | x |
| <i>Chaetoceros</i> sp. 3                                 | x | x |   | x | x |   |   | x |   |   |   |
| <i>Cocconeis costata</i>                                 | x | x | x | x | x |   | x | x | x | x | x |
| <i>Cocconeis neothumensis</i>                            | x | x | x | x | x | x | x |   | x |   | x |
| <i>Cocconeis peltoidea</i>                               | x |   |   | x |   |   |   |   |   | x |   |
| <i>Cocconeis placentula</i> shape 1                      | x | x | x | x | x |   | x | x | x | x | x |
| <i>Cocconeis placentula</i> shape 2                      | x |   |   | x |   |   |   |   | x |   | x |
| <i>Cocconeis placentula</i> var. <i>euglypta</i>         | x | x | x | x | x | x | x | x | x | x | x |
| <i>Cocconeis placentula</i> var. <i>euglypta</i> shape 2 | x |   | x |   |   |   |   |   |   |   |   |
| <i>Cocconeis scutellum</i>                               | x | x | x | x | x | x | x | x | x | x | x |
| <i>Cocconeis scutellum</i> shape 2                       | x | x | x | x | x |   |   | x |   |   | x |
| <i>Cocconeis scutellum</i> var. <i>parva</i>             | x | x | x | x | x |   | x | x | x | x | x |
| <i>Cocconeis</i> sp. 16                                  | x |   |   | x |   |   |   |   |   |   |   |
| <i>Cocconeis</i> sp. 17                                  |   | x |   | x | x |   |   |   | x |   | x |

|                                            |   |   |   |   |   |   |   |   |   |  |   |
|--------------------------------------------|---|---|---|---|---|---|---|---|---|--|---|
| <i>Cocconeis speciosa</i>                  | x | x | x | x | x |   |   |   | x |  | x |
| <i>Cocconeis stauroneiformis</i>           | x | x | x | x | x |   | x | x | x |  | x |
| <i>Ctenophora pulchella</i>                | x | x |   | x | x | x | x | x | x |  |   |
| <i>Diploneis cf. puella</i>                | x | x | x | x | x | x |   | x |   |  |   |
| <i>Diploneis didyma</i>                    | x | x | x | x | x |   |   | x |   |  |   |
| <i>Diploneis littoralis var. clathrata</i> | x | x |   |   |   |   |   | x |   |  |   |
| <i>Diploneis smithii</i>                   |   | x |   |   |   |   |   | x |   |  |   |
| <i>Eunotia binularis</i>                   | x | x |   |   | x |   |   |   |   |  |   |
| <i>Eunotia</i> group 1 (girdle view)       |   | x |   | x | x | x |   | x | x |  |   |
| <i>Eunotia</i> group 2 (girdle view)       | x | x |   | x |   |   |   | x |   |  |   |
| <i>Eunotia</i> group 3 (girdle view)       | x |   |   | x |   |   |   | x |   |  |   |
| <i>Eunotia incisa</i>                      | x | x |   | x | x | x |   |   |   |  |   |
| <i>Eunotia meisteri</i>                    | x |   |   |   |   |   |   | x |   |  |   |
| <i>Eunotia</i> sp. 25                      |   | x |   | x |   |   |   |   |   |  |   |
| <i>Eunotia</i> sp. 38                      |   |   |   | x |   |   |   | x | x |  |   |
| <i>Eunotia</i> sp. 9                       |   | x |   | x |   |   |   | x | x |  |   |
| <i>Fragilaria</i> sp. 21                   | x |   | x | x | x | x | x |   |   |  | x |
| <i>Fragilaria</i> sp. 38                   | x | x |   | x |   |   |   | x |   |  |   |

|                                                            |   |   |   |   |   |   |   |   |   |   |   |
|------------------------------------------------------------|---|---|---|---|---|---|---|---|---|---|---|
| <i>Fragilaria</i> sp. 39                                   |   |   |   | x |   |   |   |   |   |   |   |
| <i>Fragilaria striatula</i>                                | x |   |   | x |   |   |   |   |   |   |   |
| <i>Fragilariforma virescens</i> var. <i>exigua</i> shape 1 | x |   | x | x | x | x | x | x | x |   | x |
| <i>Fragilariforma virescens</i> var. <i>exigua</i> shape 2 | x | x | x | x | x |   |   | x | x | x | x |
| <i>Fragilariforma virescens</i> var. <i>subsalina</i>      |   |   |   | x | x | x |   | x |   |   |   |
| <i>Fragilariopsis cylindrus</i>                            | x | x |   | x | x | x |   | x |   |   |   |
| <i>Frustulia saxonica</i>                                  |   | x |   | x | x |   |   | x | x |   |   |
| <i>Gomphonemopsis exigua</i>                               | x | x | x | x | x | x |   | x | x | x | x |
| <i>Gomphonemopsis pseudexigua</i>                          | x |   |   | x |   |   |   |   | x |   |   |
| <i>Grammatophora marina</i>                                | x |   | x |   | x |   | x |   | x |   |   |
| <i>Grammatophora oceanica</i>                              | x | x | x | x | x |   | x | x | x |   | x |
| <i>Gyrosigma acuminatum</i>                                | x |   | x |   | x |   |   | x |   |   |   |
| <i>Gyrosigma fasciola</i>                                  | x |   | x |   | x |   |   |   |   |   | x |
| <i>Halamphora</i> cf. <i>obscura</i>                       | x |   |   |   |   | x |   | x |   |   |   |
| <i>Halamphora</i> cf. <i>tumida</i>                        | x |   |   | x |   |   | x | x | x |   | x |
| <i>Halamphora</i> sp. 21                                   |   |   |   |   |   |   |   | x |   | x |   |
| <i>Halamphora</i> sp. 29                                   | x |   |   |   | x |   |   |   |   |   |   |
| <i>Halamphora</i> sp. 30                                   | x | x | x |   | x |   |   |   |   | x |   |
| <i>Halamphora</i> sp. 36                                   |   |   |   | x |   |   |   | x |   |   |   |
| <i>Halamphora</i> sp. 39                                   |   |   |   | x |   |   |   |   |   |   |   |



|                                          |   |   |   |   |   |   |   |   |   |   |   |
|------------------------------------------|---|---|---|---|---|---|---|---|---|---|---|
| <i>Halamphora</i> sp. 50                 |   |   | x | x |   |   |   |   | x |   |   |
| <i>Haslea crucigera</i>                  | x |   |   |   |   |   |   |   |   |   |   |
| <i>Licmophora dalmatica</i>              |   |   | x | x | x |   | x |   |   |   |   |
| <i>Luticola mutica</i>                   |   |   |   | x |   |   |   |   |   |   |   |
| <i>Martyana schulzii</i>                 | x |   |   | x |   | x |   |   |   |   |   |
| <i>Mastogloia</i> cf. <i>pumila</i>      | x | x |   |   | x |   |   | x |   |   |   |
| <i>Mastogloia exigua</i>                 |   |   | x |   | x | x |   |   |   |   |   |
| <i>Melosira ambigua</i>                  | x |   |   |   |   |   |   |   |   |   |   |
| <i>Melosira moniliformis</i>             | x |   |   |   |   |   |   |   |   |   |   |
| <i>Melosira numuloides</i>               | x |   |   | x |   |   |   |   |   |   |   |
| <i>Melosira varians</i>                  | x |   |   | x |   |   | x | x |   |   |   |
| <i>Navicula</i> aff. <i>subadnata</i>    | x |   |   | x | x | x |   | x |   |   | x |
| <i>Navicula arenaria</i>                 | x |   |   |   |   |   | x |   |   |   |   |
| <i>Navicula</i> cf. <i>cari</i>          | x |   |   |   |   |   |   | x |   |   |   |
| <i>Navicula</i> cf. <i>flanatica</i>     |   | x |   | x | x |   | x | x |   |   |   |
| <i>Navicula</i> cf. <i>halophiloides</i> |   | x |   |   |   | x |   | x |   | x | x |
| <i>Navicula</i> cf. <i>sublucidula</i>   | x |   |   |   |   | x |   |   |   |   |   |
| <i>Navicula directa</i>                  | x |   | x | x |   |   |   | x |   |   |   |
| <i>Navicula germanopolonica</i>          | x | x | x | x |   |   | x | x | x | x | x |
| <i>Navicula gregaria</i>                 | x | x | x | x | x | x | x | x | x |   | x |
| <i>Navicula gregaria</i> shape 2         | x |   |   | x | x | x |   | x |   |   | x |

|                                        |   |   |   |   |   |   |  |   |   |   |   |
|----------------------------------------|---|---|---|---|---|---|--|---|---|---|---|
| <b>Navicula group 1 (girdle view)</b>  | x | x |   | x | x |   |  | x | x | x | x |
| <b>Navicula group 10 (girdle view)</b> |   |   |   |   | x |   |  |   |   |   |   |
| <b>Navicula group 11 (girdle view)</b> |   |   |   |   | x | x |  |   |   |   |   |
| <b>Navicula group 12 (girdle view)</b> | x |   | x |   |   |   |  | x |   |   |   |
| <b>Navicula group 2 (girdle view)</b>  | x | x |   | x | x |   |  | x |   |   |   |
| <b>Navicula group 4 (girdle view)</b>  | x |   | x | x |   |   |  |   |   |   |   |
| <b>Navicula group 5 (girdle view)</b>  | x |   |   |   | x |   |  | x | x | x | x |
| <b>Navicula group 6 (girdle view)</b>  | x |   |   |   |   |   |  |   | x |   |   |
| <b>Navicula group 7 (girdle view)</b>  |   |   | x | x | x |   |  |   | x | x |   |
| <b>Navicula group 8 (girdle view)</b>  | x |   |   |   |   |   |  | x |   |   |   |

|                                       |   |   |   |   |   |  |   |   |   |   |   |
|---------------------------------------|---|---|---|---|---|--|---|---|---|---|---|
| <b>Navicula group 9 (girdle view)</b> |   |   |   |   | x |  |   |   |   | x |   |
| <i>Navicula lanceolata</i>            | x |   |   | x |   |  | x |   |   |   |   |
| <i>Navicula parapontica</i>           | x | x | x | x |   |  |   | x | x |   |   |
| <i>Navicula pavillardii</i>           | x |   |   | x |   |  | x | x | x | x | x |
| <i>Navicula perminuta</i>             | x | x | x | x | x |  | x | x | x |   | x |
| <i>Navicula phyllepta</i> shape 2     | x | x | x | x | x |  |   | x |   |   |   |
| <i>Navicula phyllepta</i> shape 1     |   | x | x | x | x |  | x | x | x |   | x |
| <i>Navicula platyventris</i>          | x |   |   |   |   |  |   | x |   |   |   |
| <i>Navicula ramosissima</i>           | x |   |   | x |   |  |   | x | x |   |   |
| <i>Navicula salinarum</i>             | x |   |   |   |   |  |   | x |   |   | x |
| <i>Navicula</i> sp. 102               | x | x | x | x | x |  | x | x | x | x | x |
| <i>Navicula</i> sp. 105               |   |   |   |   | x |  |   |   |   |   |   |
| <i>Navicula</i> sp. 13                |   | x |   | x | x |  |   | x | x |   | x |
| <i>Navicula</i> sp. 178               | x | x |   |   |   |  |   |   |   |   |   |
| <i>Navicula</i> sp. 196               |   | x |   | x | x |  |   | x |   |   |   |
| <i>Navicula</i> sp. 227               | x |   |   |   |   |  |   |   |   | x | x |
| <i>Navicula</i> sp. 278               |   |   | x | x |   |  |   |   |   |   |   |
| <i>Navicula</i> sp. 285               |   |   |   |   | x |  |   |   |   |   | x |
| <i>Navicula</i> sp. 324               | x |   |   | x | x |  | x |   |   |   |   |

|                                                     |   |   |   |   |   |   |   |   |   |   |   |
|-----------------------------------------------------|---|---|---|---|---|---|---|---|---|---|---|
| <i>Navicula</i> sp. 325                             | x |   |   |   |   |   |   |   |   |   |   |
| <i>Navicula</i> sp. 41                              | x |   |   | x | x |   | x | x |   |   | x |
| <i>Navicula</i> sp. 82                              | x |   |   |   | x |   |   | x |   |   | x |
| <i>Navicula</i> sp. 87                              | x | x |   | x | x |   |   | x | x |   |   |
| <i>Navicula subinflata</i>                          |   |   |   | x | x |   |   | x |   |   |   |
| <i>Neosynedra provincialis</i>                      | x |   | x | x | x |   |   |   |   |   |   |
| <i>Nitzschia agnita</i>                             |   |   |   | x | x |   |   |   |   |   |   |
| <i>Nitzschia angustatula</i>                        | x | x | x | x | x |   |   | x | x |   |   |
| <i>Nitzschia brevissima</i>                         | x | x |   |   |   |   |   |   |   |   |   |
| <i>Nitzschia capitellata</i>                        | x | x |   | x | x |   |   | x |   |   |   |
| <i>Nitzschia clausii</i>                            | x | x |   | x |   |   |   | x | x |   |   |
| <i>Nitzschia compressa</i> var.<br><i>balatonis</i> | x |   |   | x | x | x |   | x | x |   |   |
| <i>Nitzschia dissipata</i>                          | x | x | x | x | x |   | x | x | x |   | x |
| <i>Nitzschia filiformis</i>                         | x |   |   | x | x | x |   | x | x |   |   |
| <i>Nitzschia fonticola</i>                          | x |   | x | x |   |   | x | x |   |   |   |
| <i>Nitzschia frustulum</i>                          | x | x | x | x | x |   | x | x | x | x | x |
| <i>Nitzschia improvisa</i>                          | x |   | x | x | x |   |   | x |   |   |   |
| <i>Nitzschia inconspicua</i>                        | x | x |   | x |   | x | x | x | x |   |   |
| <i>Nitzschia liebetruthii</i>                       | x | x | x | x | x | x |   | x | x |   | x |

|                                       |   |   |   |   |   |   |   |   |   |   |   |
|---------------------------------------|---|---|---|---|---|---|---|---|---|---|---|
| <i>Nitzschia microcephala</i> shape 1 |   | x |   | x |   | x |   |   |   |   |   |
| <i>Nitzschia microcephala</i> shape 2 | x |   |   |   | x | x |   |   |   |   |   |
| <i>Nitzschia ovalis</i>               |   | x |   | x |   |   | x | x |   |   |   |
| <i>Nitzschia palea</i>                | x | x | x | x | x | x | x | x | x |   |   |
| <i>Nitzschia pusilla</i> shape 1      |   |   |   | x | x |   | x | x |   |   |   |
| <i>Nitzschia pusilla</i> shape 2      | x | x |   | x |   |   | x |   |   |   |   |
| <i>Nitzschia reversa</i>              | x | x | x | x |   |   | x | x |   |   |   |
| <i>Nitzschia scalpelliformis</i>      |   |   |   | x |   |   |   |   | x |   |   |
| <i>Nitzschia sigma</i>                | x | x | x | x | x |   | x | x | x |   |   |
| <i>Nitzschia</i> sp. 140              | x |   | x |   |   |   |   |   |   |   |   |
| <i>Nitzschia</i> sp. 178              |   |   | x |   | x |   |   |   |   |   |   |
| <i>Nitzschia</i> sp. 180              |   |   | x | x |   |   |   |   | x | x |   |
| <i>Nitzschia</i> sp. 21               | x | x | x | x | x | x |   | x | x |   |   |
| <i>Nitzschia</i> sp. 30               | x | x | x |   | x |   |   | x | x |   | x |
| <i>Nitzschia</i> sp. 40               |   |   |   | x | x |   | x | x |   |   |   |
| <i>Nitzschia</i> sp. 5                | x |   |   |   | x | x |   | x |   |   |   |
| <i>Nitzschia</i> sp. 64               | x | x |   | x | x |   |   | x |   |   |   |
| <i>Nitzschia</i> sp. 79               | x |   |   | x |   |   |   | x |   |   |   |
| <i>Nitzschia</i> sp. 88               | x | x |   | x |   |   |   | x |   |   |   |
| <i>Nitzschia thermaloides</i>         | x |   |   | x |   |   | x | x | x |   | x |
| <i>Nitzschia tubicola</i>             | x |   |   | x |   |   |   | x |   |   |   |



|                                              |   |   |   |   |   |   |   |   |   |   |   |
|----------------------------------------------|---|---|---|---|---|---|---|---|---|---|---|
| <i>Pseudostaurosira cf. brevistriata</i>     | x |   |   |   |   | x |   |   |   |   |   |
| <i>Rhabdonema arcuatum</i>                   | x |   |   | x |   |   | x |   | x |   |   |
| <i>Rhoicosphenia abbreviata</i>              | x | x | x | x |   |   | x | x | x | x | x |
| <i>Rhopalodia brebissonii</i>                | x | x |   | x |   |   |   |   | x |   |   |
| <i>Surirella brebissonii</i>                 | x | x |   | x | x | x | x |   | x |   |   |
| <i>Surirella brebissonii var. kuetzingii</i> |   | x |   |   |   |   |   |   |   |   |   |
| <i>Surirella brebissonii var. punctata</i>   | x | x |   | x | x | x | x | x | x |   |   |
| <i>Surirella brightwelli</i>                 | x |   |   |   |   | x |   | x |   |   |   |
| <i>Tabellaria fenestrata</i>                 |   | x |   |   |   | x |   |   | x |   |   |
| <i>Tabellaria flocculosa</i>                 | x | x |   | x | x | x |   | x | x |   |   |
| <i>Tabularia fasciculata</i>                 | x | x | x | x | x | x | x | x | x | x | x |
| <i>Tabularia investiens</i>                  |   |   |   |   |   |   |   | x |   |   |   |
| <i>Tabularia waernii</i>                     | x | x |   | x |   |   |   |   |   |   |   |
| <i>Thalassionema nitzschioides</i>           | x | x | x | x | x |   | x | x | x | x | x |
| <i>Thalassiosira baltica</i>                 | x | x |   |   | x | x |   | x |   |   |   |
| <i>Thalassiosira eccentrica</i>              | x |   |   | x | x |   |   | x | x |   |   |

|                                   |   |   |   |   |   |   |  |   |   |   |   |
|-----------------------------------|---|---|---|---|---|---|--|---|---|---|---|
| <i>Thalassiosira guillardii</i>   | x |   | x | x |   |   |  |   | x | x | x |
| <i>Thalassiosira pacifica</i>     |   | x |   | x | x |   |  | x |   |   |   |
| <i>Thalassiosira proschkiniae</i> | x | x |   | x |   |   |  | x |   |   |   |
| <i>Thalassiosira</i> sp. 16       |   |   |   | x | x |   |  | x |   |   |   |
| <i>Thalassiosira</i> sp. 3        | x | x |   | x |   |   |  |   |   |   |   |
| <i>Tryblionella</i> sp. 1         |   |   |   | x |   |   |  | x | x |   |   |
| <i>Tryblionella apiculata</i>     | x | x | x | x | x |   |  | x | x |   |   |
| <i>Tryblionella coarcata</i>      | x |   |   | x | x |   |  | x | x |   |   |
| <i>Tryblionella levidensis</i>    | x | x |   | x | x | x |  | x |   |   |   |
| <i>Tryblionella punctata</i>      | x | x | x | x | x |   |  | x | x |   |   |



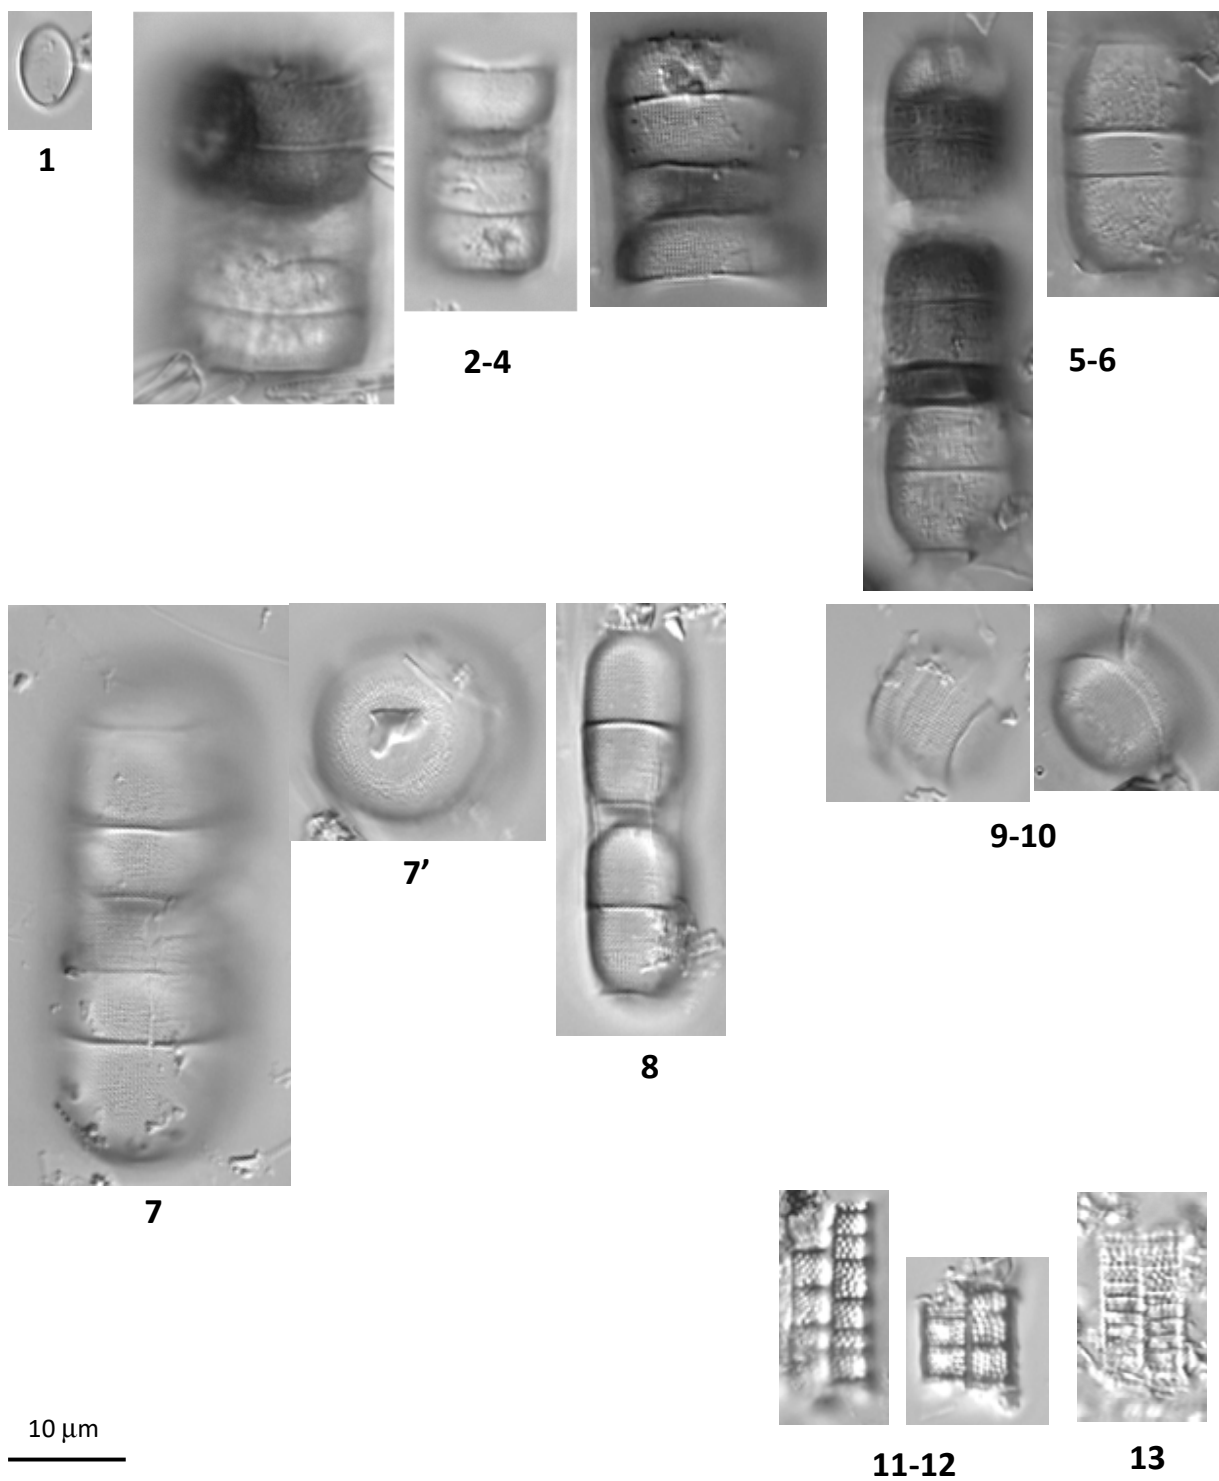

**Figure S1.** *Chaetoceros* sp. 3. 2-4 :*Melosira ambigua*. 5-6: *Melosira moniliformis*. 7- 8: *Melosira varians*. 9-10: *Melosira nummuloides*. 11-12: *Aulacoseira* sp. 3. 13: *Aulacoseira* sp. 2.

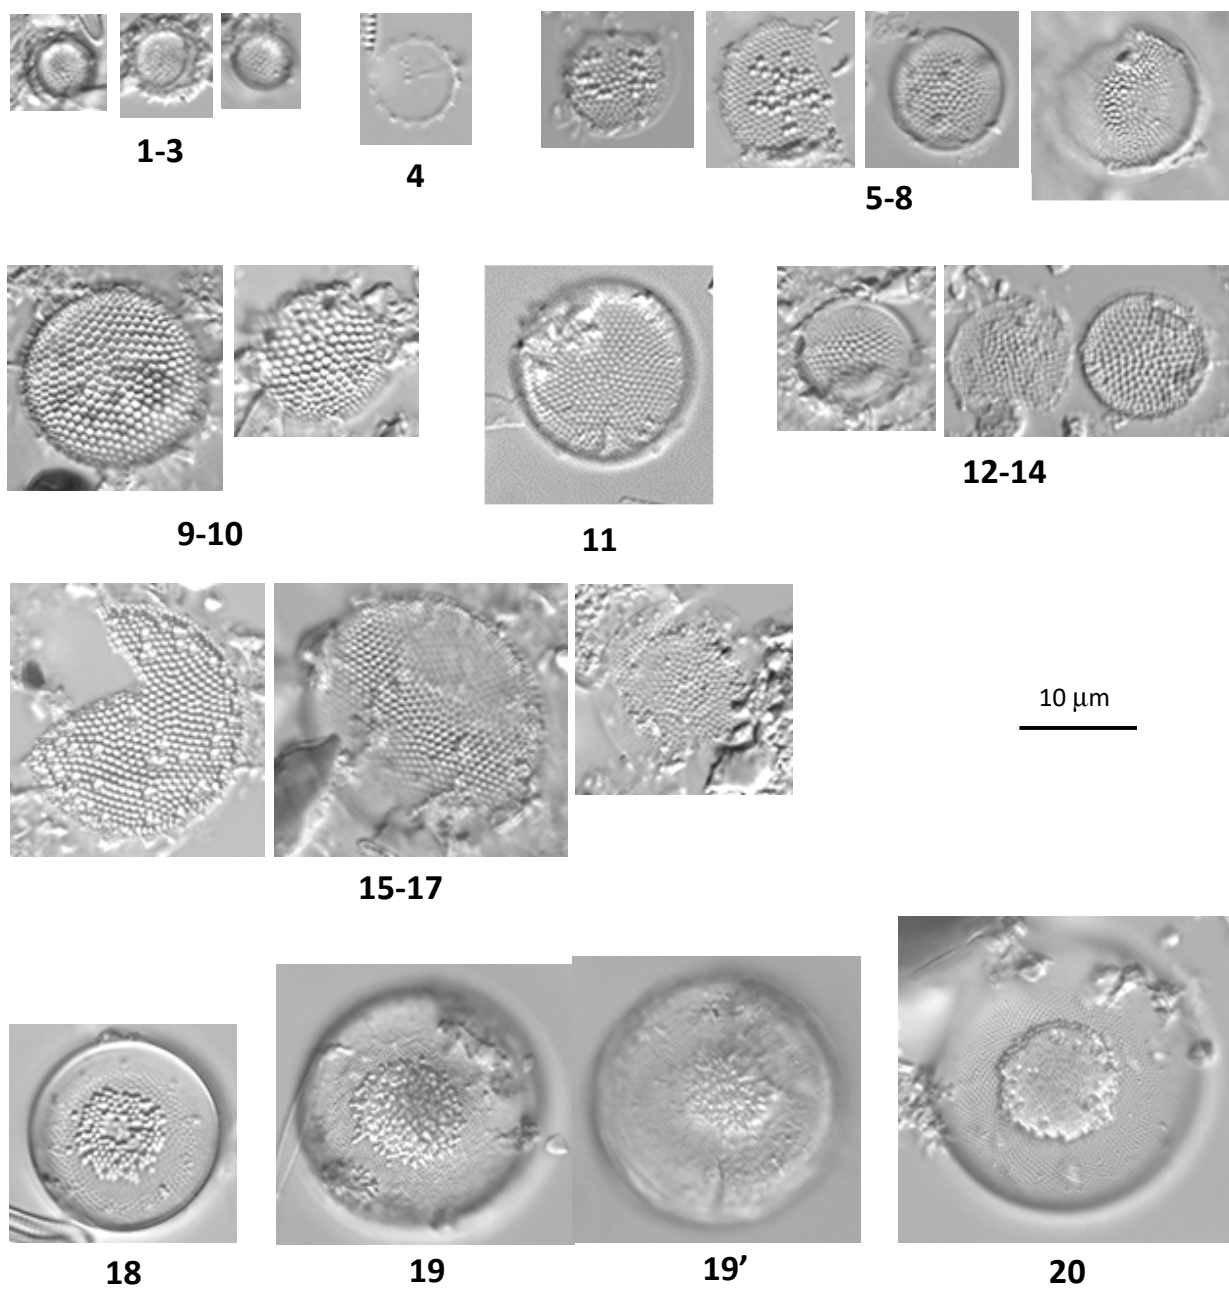

**Figure S2.** 1-3: *Thalassiosira proschkiniae*. 4: *Thalassiosira guillardii*. 5-8: *Thalassiosira pacifica*. 9-10: *Thalassiosira eccentrica*. 11: *Thalassiosira baltica*. 12-14: *Thalassiosira* sp. 16. 15-17: *Thalassiosira* sp. 3. 18-20: *Podosira stelligera*.

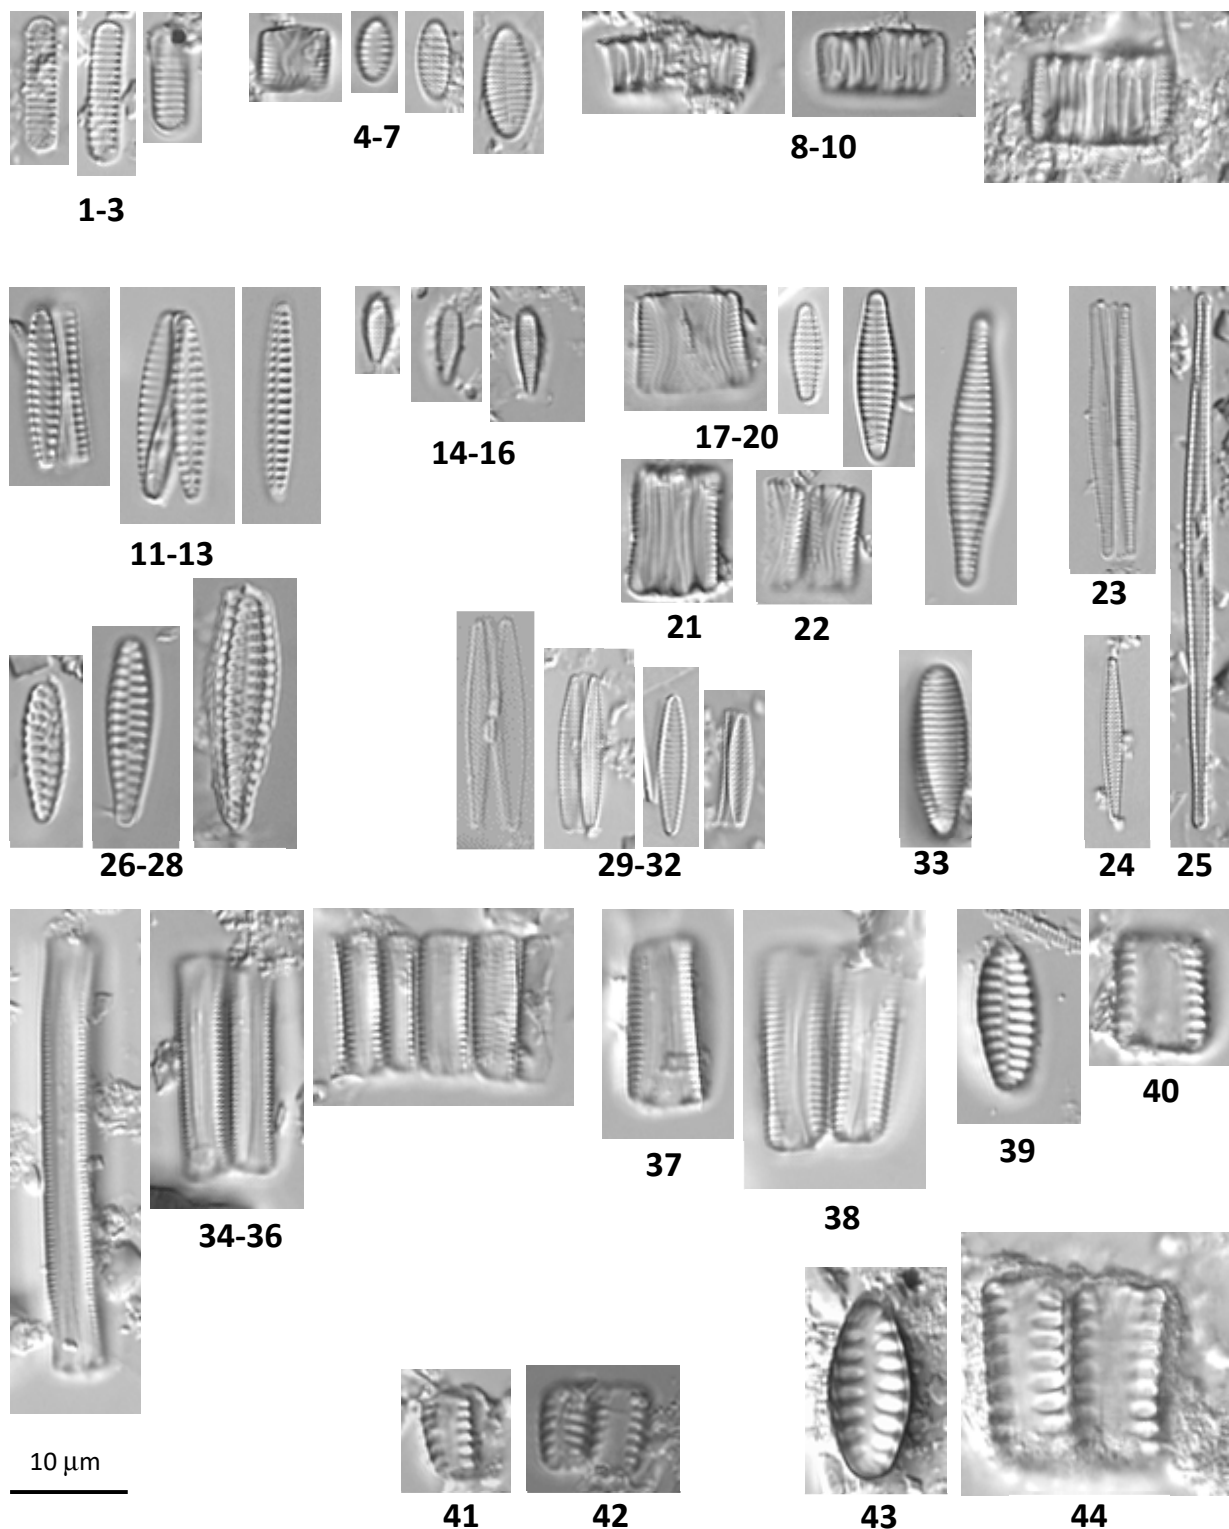

**Figure S3.** 1-3: *Fragilariopsis cylindrus*. 4-7: *Fragilariforma virescens* var. *exigua*. 8-10: *Fragilaria* sp. 38. 11-13: *Tabularia investiens*. 14-16: *Fragilariforma virescens* var. *subsalina*. 17-22: *Fragilariforma virescens* var. *exigua* shape 2. 23-25: *Tabularia waernii*. 26-28: *Opephora mutabilis*. 29-32: *Fragilaria* sp. 21. 33: *Martyana schulzii*. 34-36: **Girdle view** *Pseudostaurosira* cf. *brevistriata*. 37-38: *Fragilaria* sp. 39. 39-40: *Opephora mutabilis* shape 2. 41-42: *Opephora* sp. 30. 43-44: *Opephora martyi*.

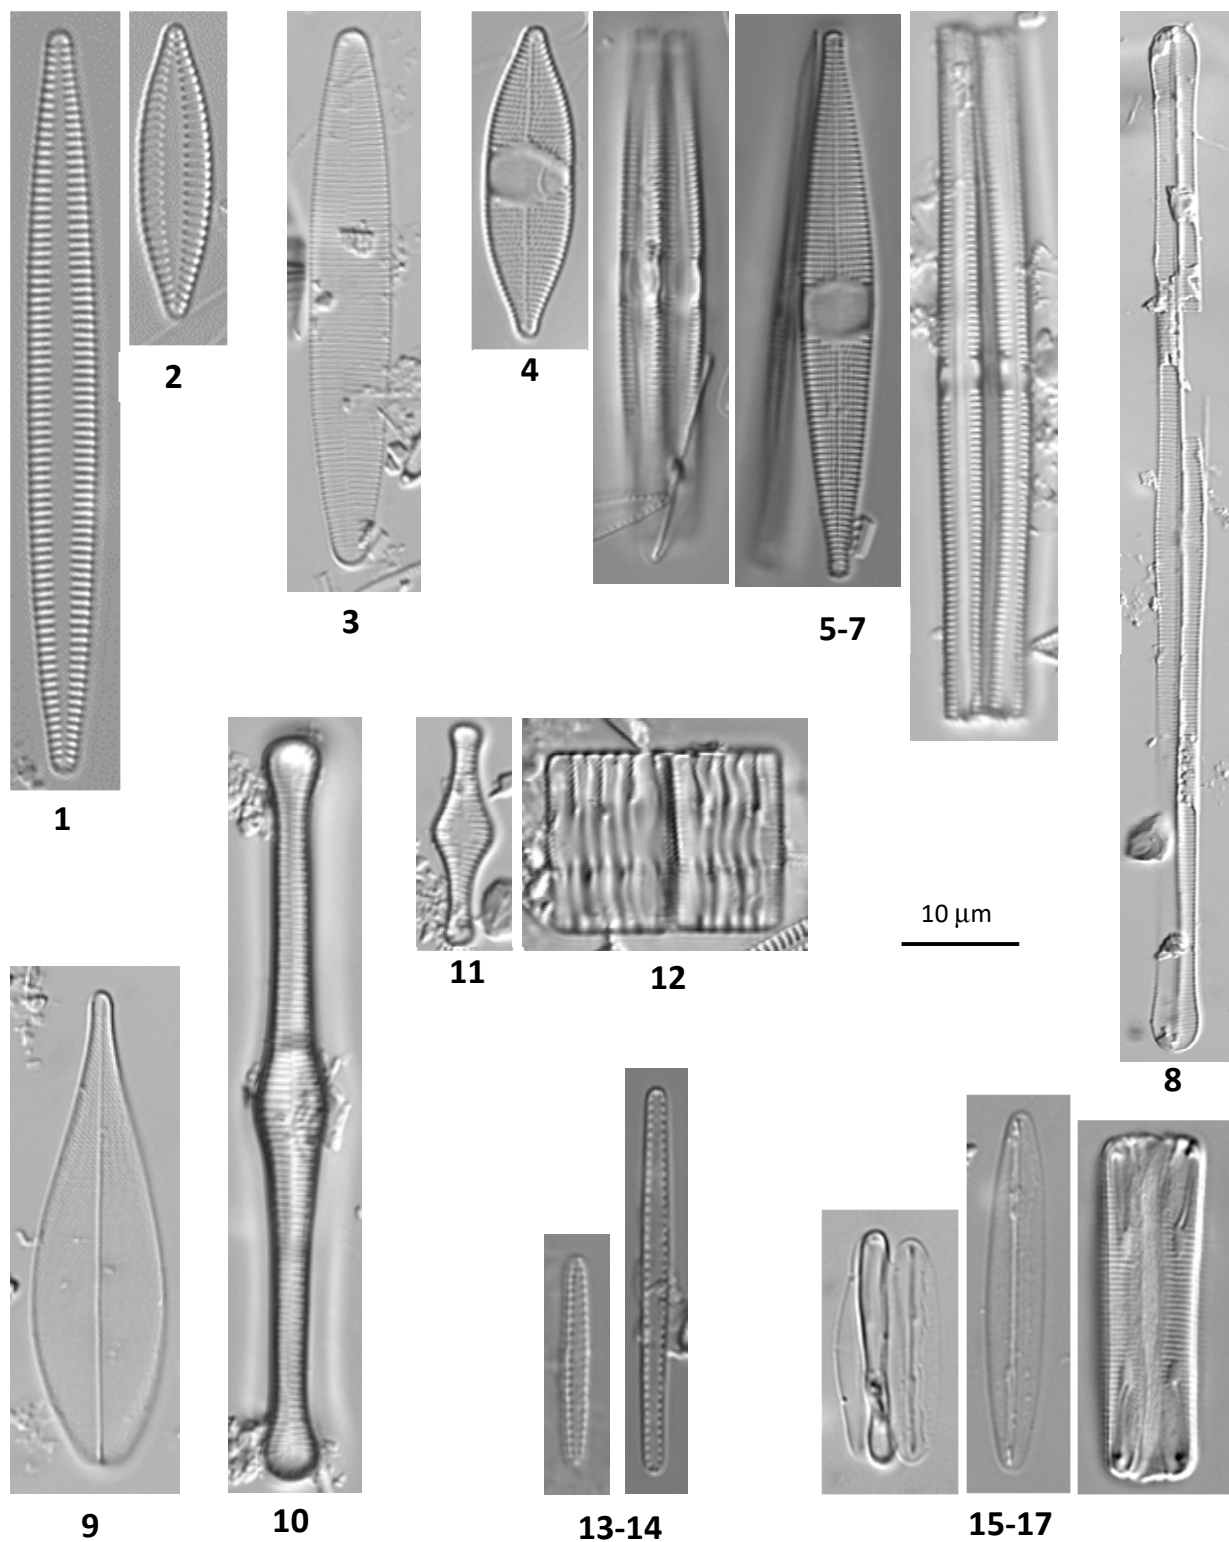

**Figure S4.** 1-2: *Tabularia fasciculata*. 3: *Fragilaria striatula*. 4-7: *Ctenophora pulchella*. 8: *Neosynedra provincialis*. 9: *Licmophora dalmatica*. 10: *Tabellaria fenestrata*. 11-12: *Tabellaria flocculosa*. 13-14: *Thalassionema nitzschioides*. 15-17: *Berkeleya rutilans*.

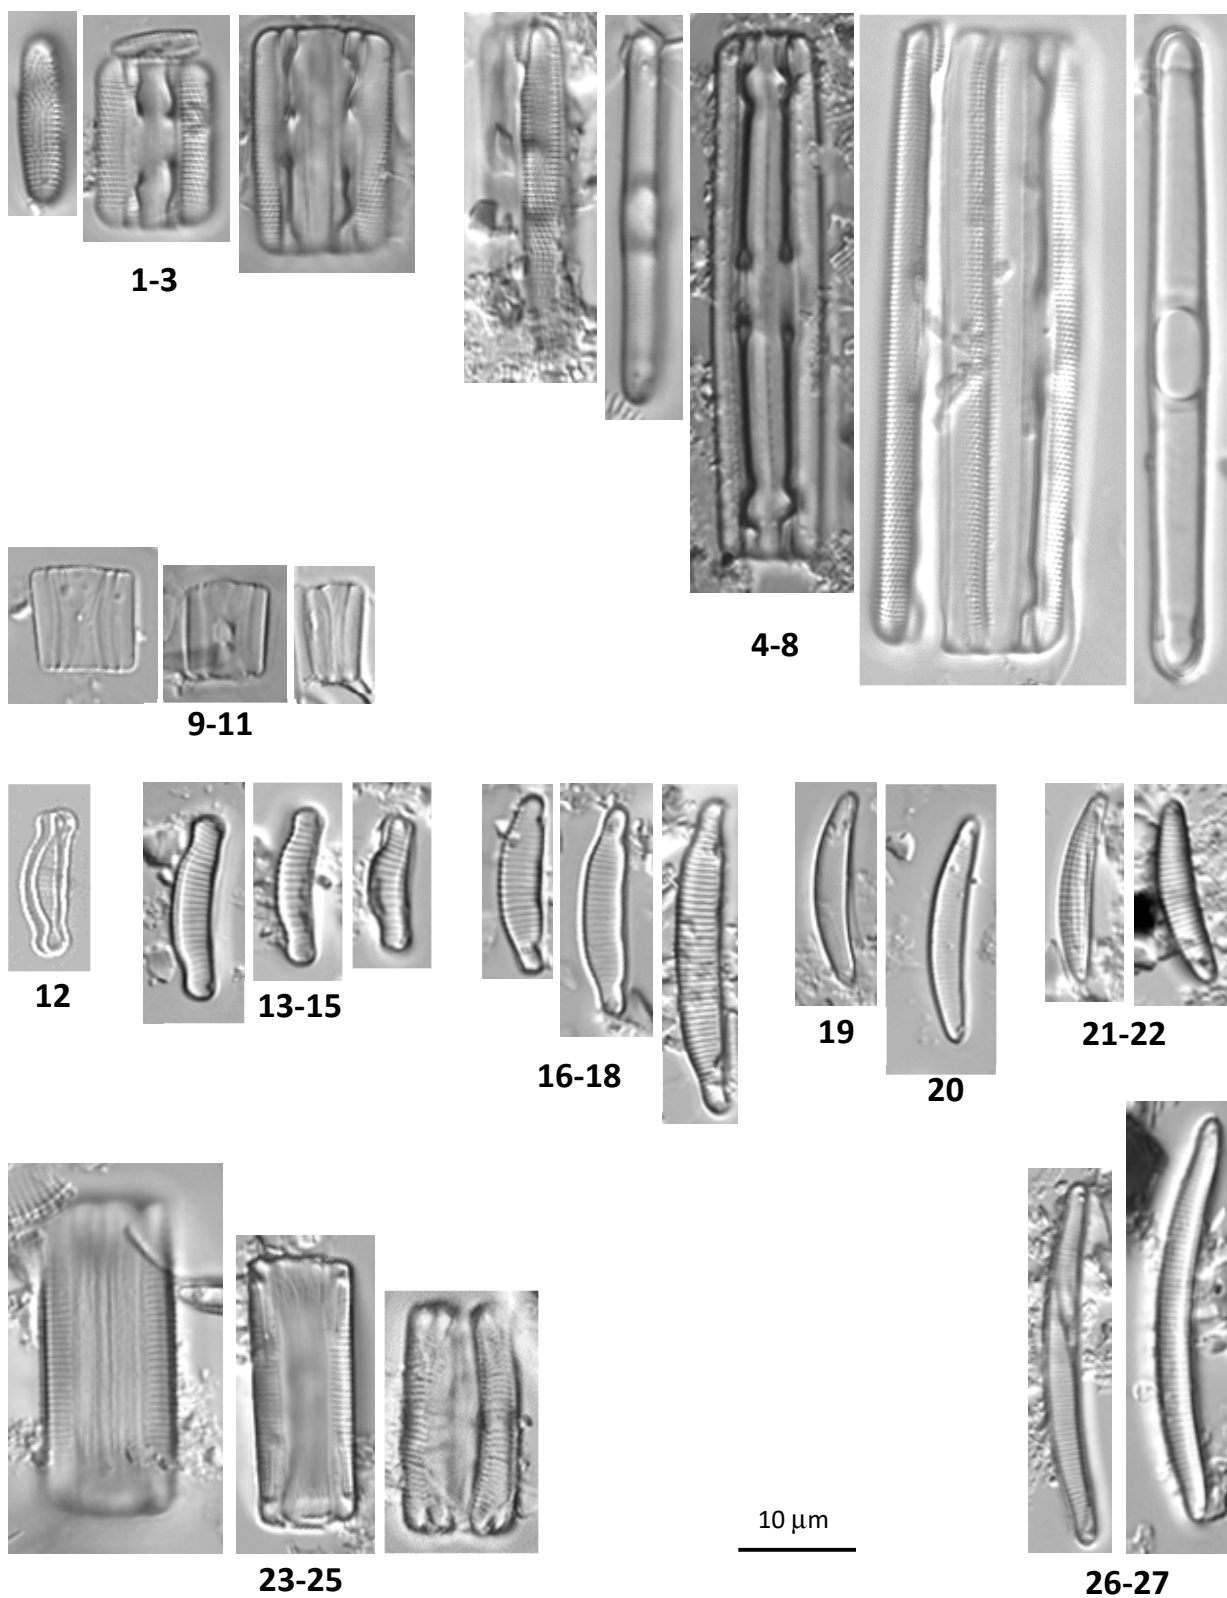

**Figure S5.** 1-3: *Grammatophora marina*. 4-8: *Grammatophora oceanica*. 9-11: Girdle view *Eunotia* group 3. 12: *Eunotia meisteri*. 13-15: *Eunotia* sp. 9. 16-18: *Eunotia incisa*. 19-20: *Eunotia* sp. 38. 21-22: *Eunotia* sp. 25. 23-25: Girdle view *Eunotia* group 2. 26-27: *Eunotia bilunaris*.

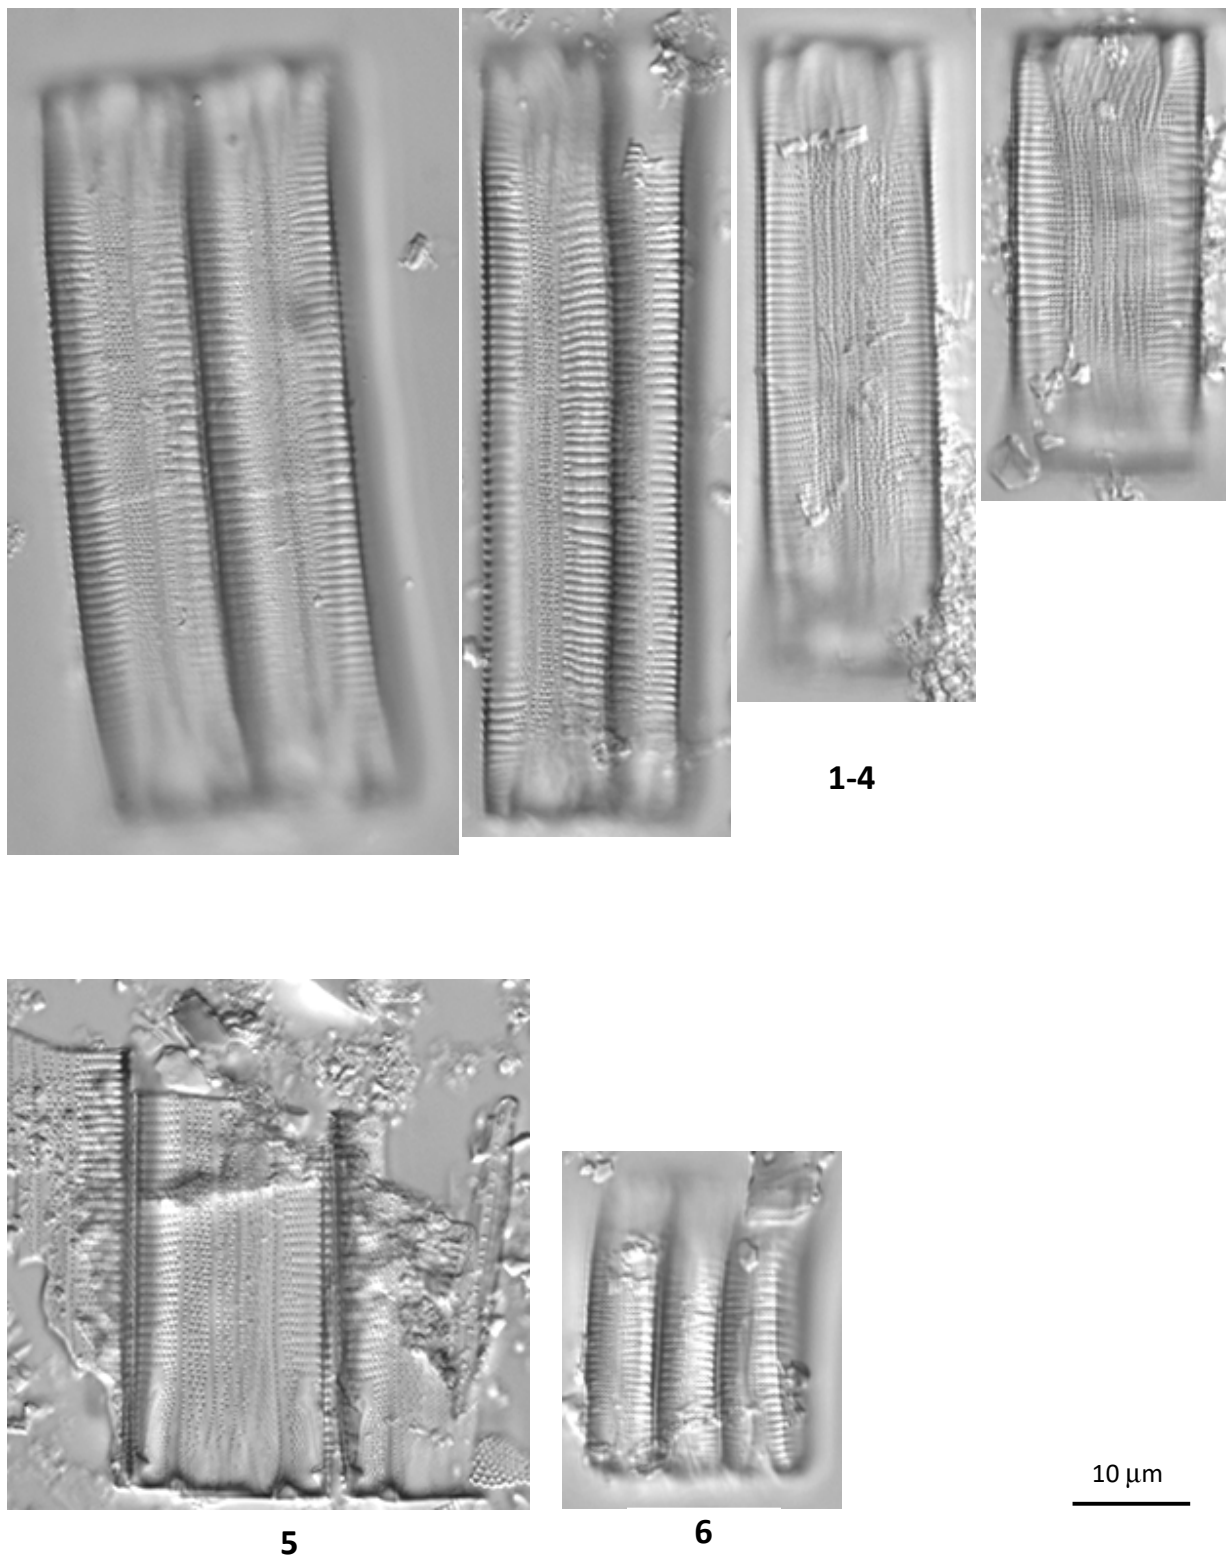

**Figure S6. 1-6: Girdle view *Eunotia* group 1.**

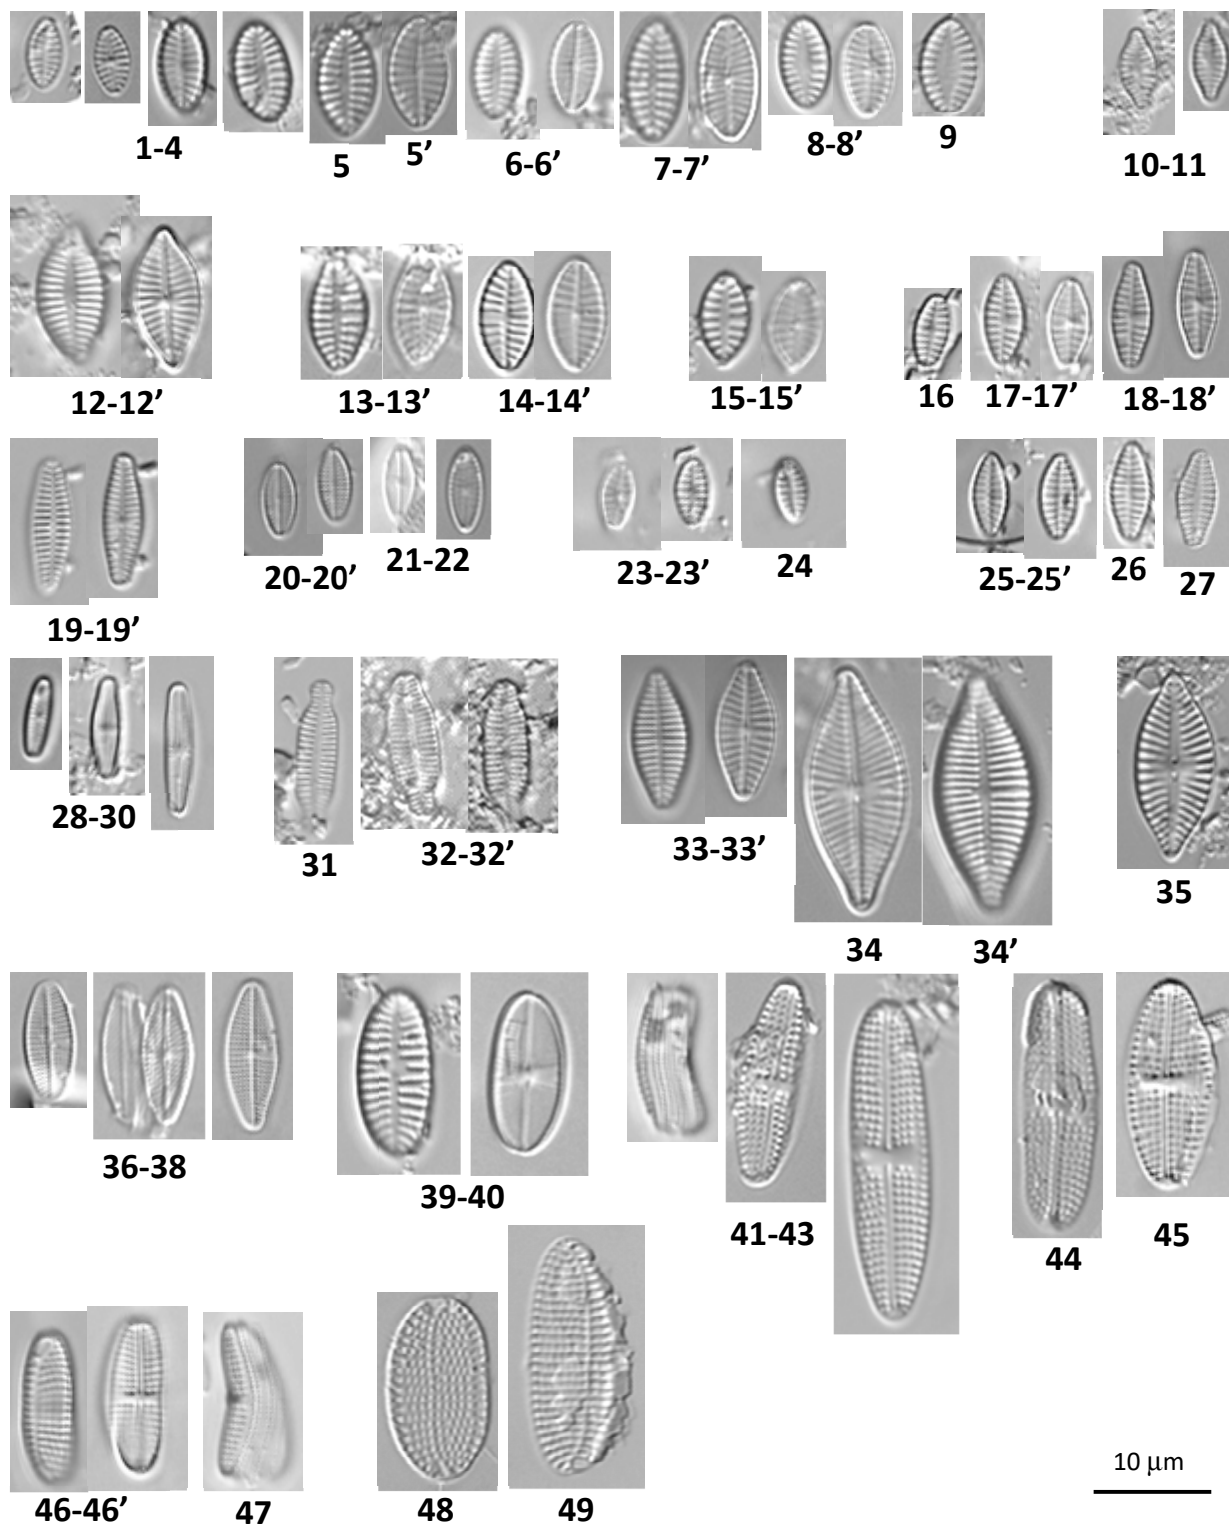

**Figure S7.** 1-9: *Planothidium* cf. *hauckiana*. 10-11: *Achnanthes minuscula*. 12-12': *Achnanthes* sp. 76. 13-14': *Achnanthes* sp. 23. 15-15': *Planothidium* sp. 39. 16-18': *Planothidium* sp. 21. 19-19': *Planothidium pericavum*. 20-22: *Achnanthes* sp. 61. 23-24: *Achnanthes* sp. 67. 25-27': *Achnanthes* cf. *ricula*. 28-30: *Achnantheidium minutissimum*. 31-32': *Achnanthes nitidiformis*. 33-34': *Achnanthes delicatula*. 35: *Achnanthes delicatula* subsp. *septentrionalis*. 36-38: *Achnanthes* cf. *punctulata*. 39-40: *Platessa oblongella*. 41-43: *Achnanthes brevipes* var. *intermedia*. 44-45: *Achnanthes brevipes* var. *intermedia* shape 2. 46-47: *Achnanthes* cf. *kuwaitensis*. 48-49: *Achnanthes* cf. *kuwaitensis* shape 2.

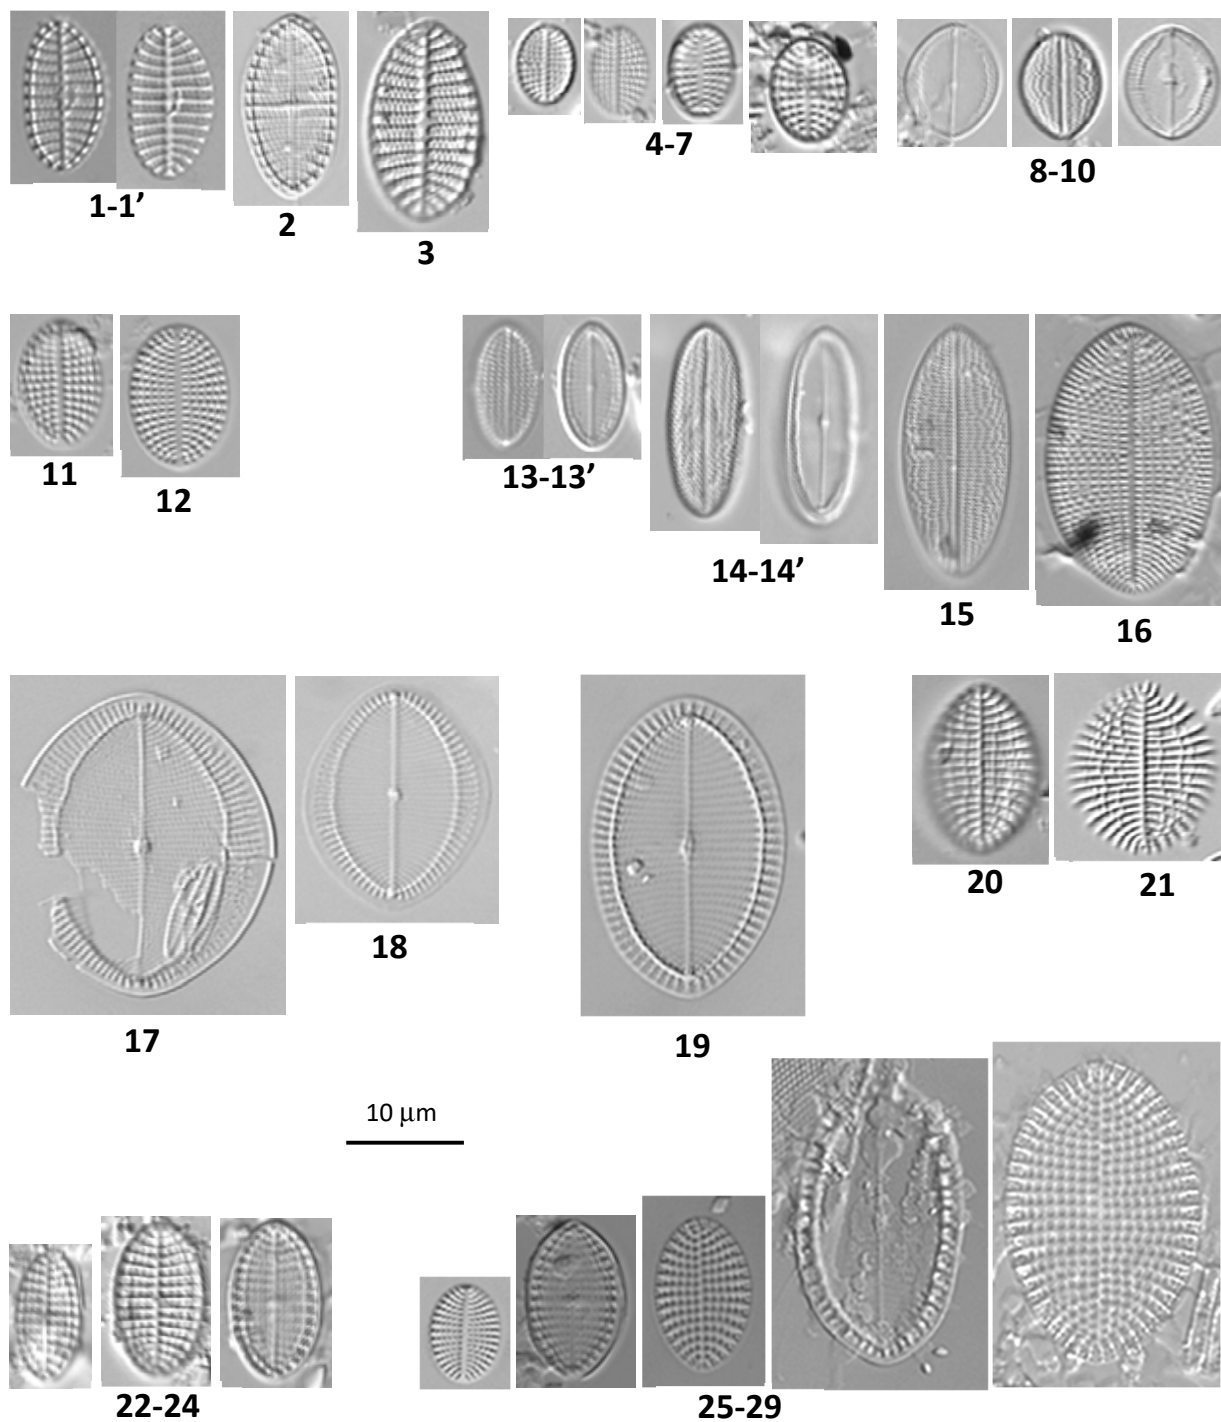

**Figure S8.** 1-3: *Cocconeis costata*. 4-7: *Cocconeis neothumensis*. 8-10: *Cocconeis* sp. 16. 11-12: *Cocconeis placentula* var. *euglypta* shape 2. 13-16: *Cocconeis placentula* var. *euglypta*. 17-18: *Cocconeis placentula* shape 2. 19: *Cocconeis placentula* shape 1. 20-21: *Cocconeis speciosa*. 22-24: *Cocconeis scutellum* var. *parva*. 25-29: *Cocconeis scutellum*.



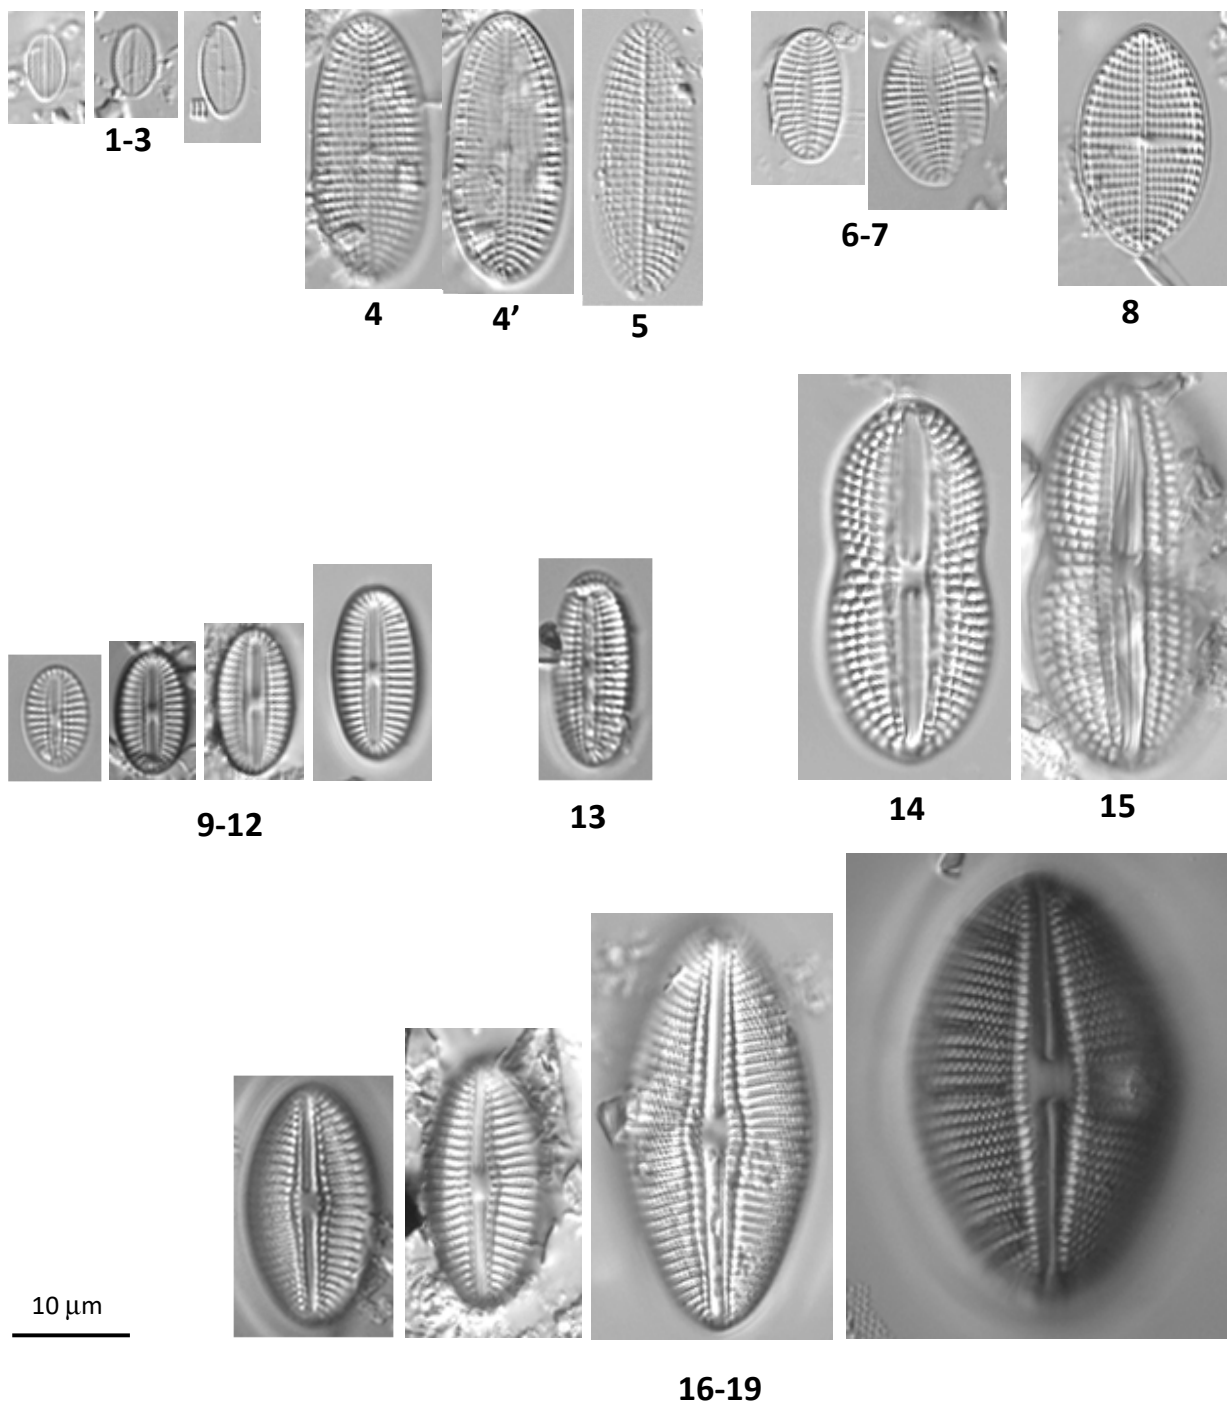

**Figure S9.** 1-3: *Cocconeis* sp. 17. 4-5: *Cocconeis* sp. 2. 6-7: *Cocconeis peltoides*. 8: *Cocconeis stauroneiformis*. 9-12: *Diploneis* cf. *puella*. 13: *Diploneis littoralis* var. *clathrata*. 14-15: *Diploneis didyma*. 16-19: *Diploneis smithii*.

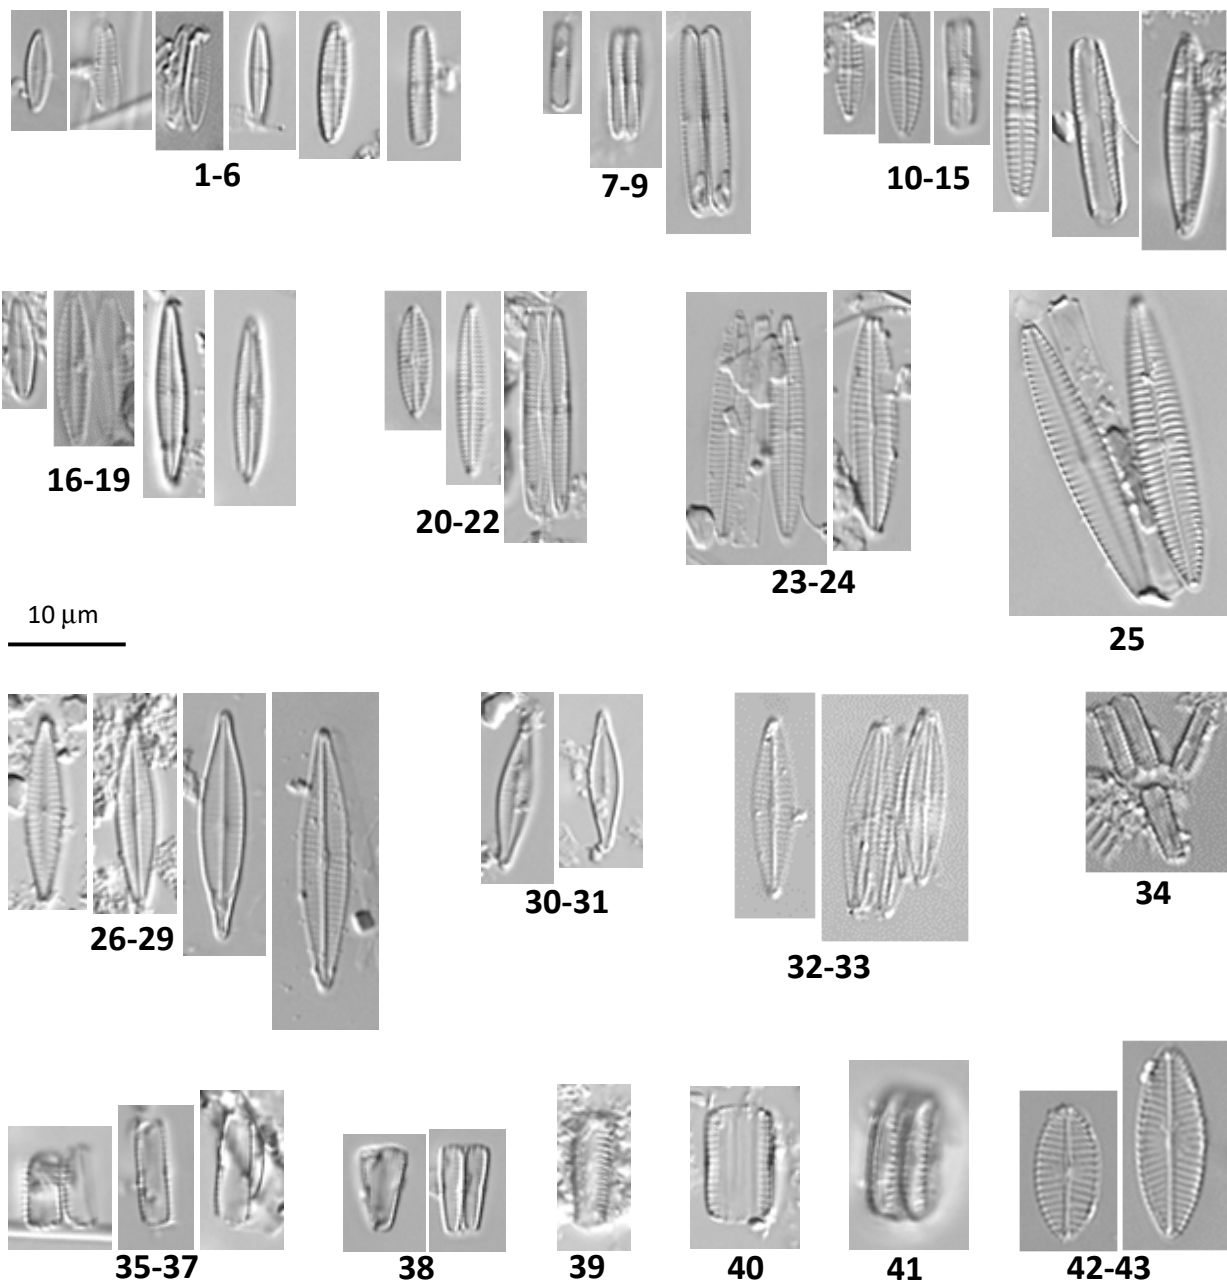

**Figure S10.** 1-6: *Navicula* sp. 41. 7-9: **Girdle view** *Navicula* group 1 (*N. perminuta*?). 10-15: *Navicula perminuta*. 16-19: *Navicula* sp. 102. 20-22: *Navicula* sp. 278. 23-24: *Navicula* sp. 227. 25: *Navicula* sp. 87. 26-29: *Navicula* sp. 196. 30-31: *Navicula* sp. 82. 32-33: *Navicula halophilioides*. 34: **Girdle view** *Navicula* group 8. 35-37: **Girdle view** *Navicula* group 7. 38: **Girdle view** *Navicula* group 6. 39: **Girdle view** *Navicula* group 11. 40: **Girdle view** *Navicula* group 10. 41: *Navicula* sp. 178. 42-43: *Navicula* cf. *germanopolonica*.

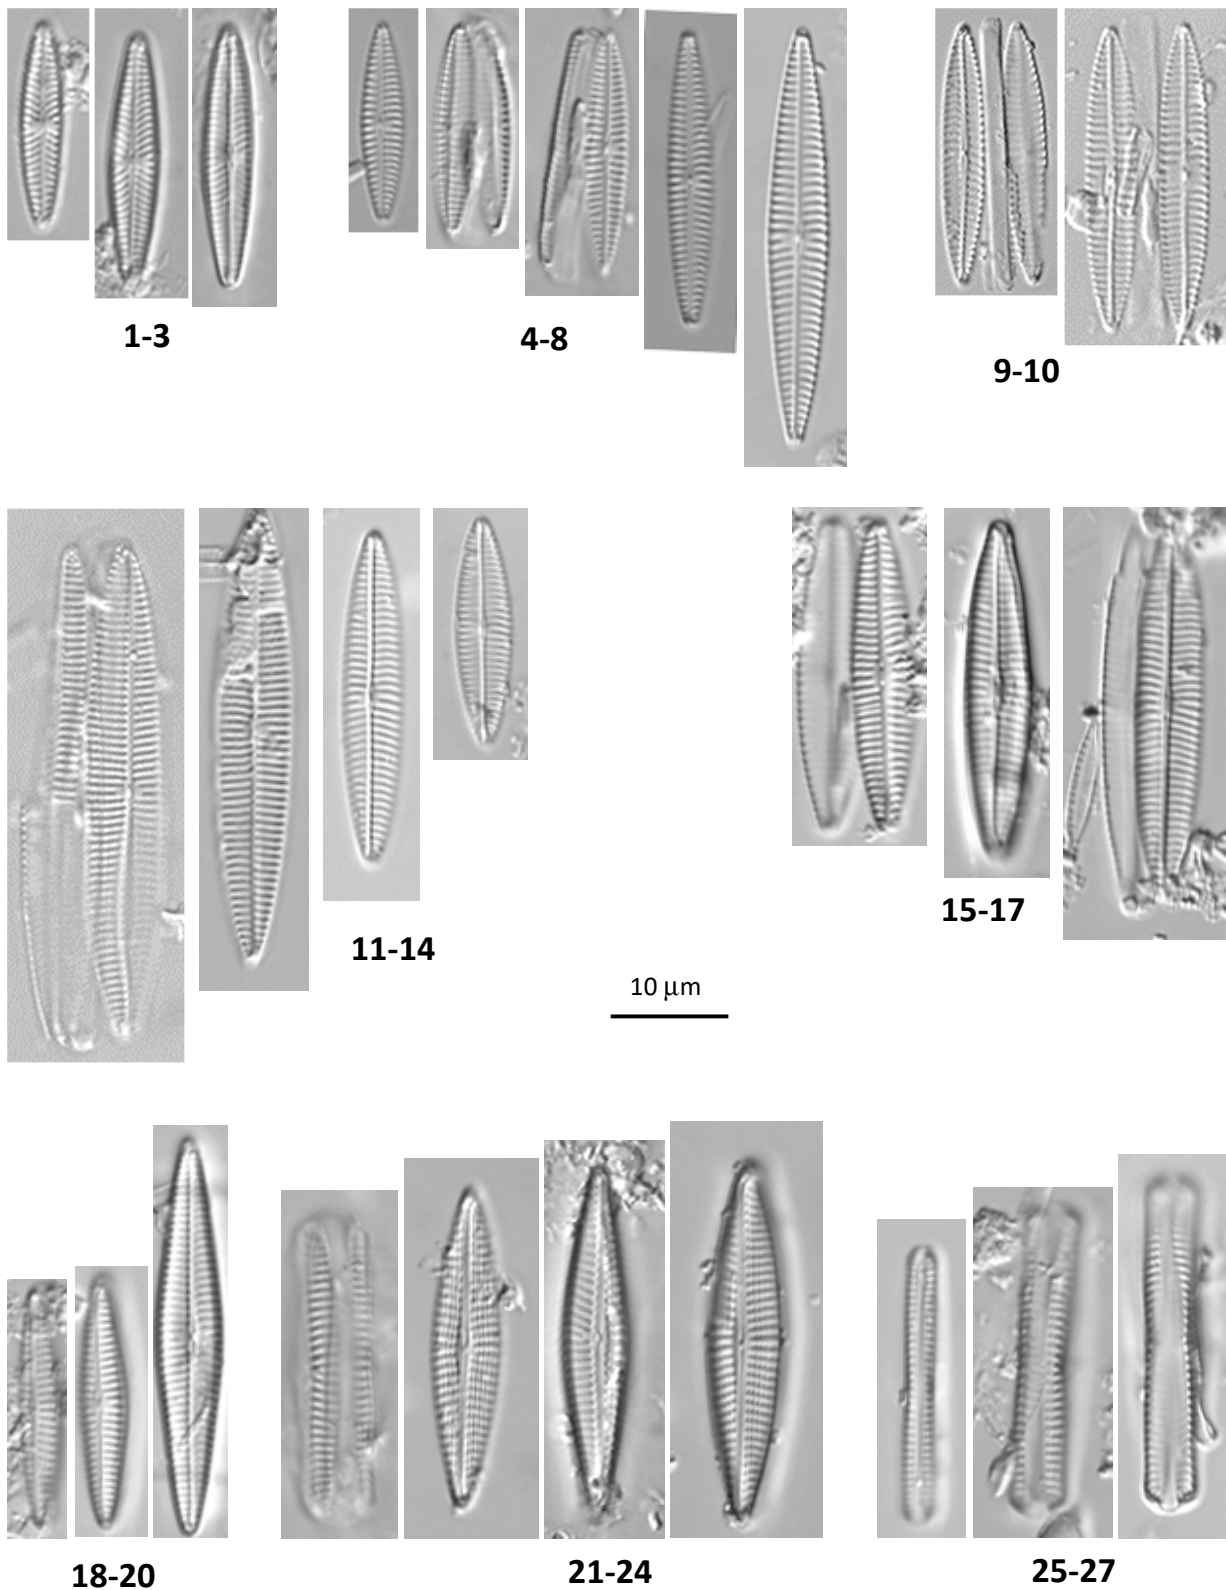

**Figure S11.** 1-3: *Navicula* cf. *cari*. 4-8: *Navicula* *ramosissima*. 9-10: *Navicula* *arenaria*. 11-14: *Navicula* *pavillardii*. 15-17: *Navicula* *parapontica*. 18-20: *Navicula* sp. 324. 21-24: *Navicula* cf. *flanatica*. 25-27: Girdle view *Navicula* group 2.

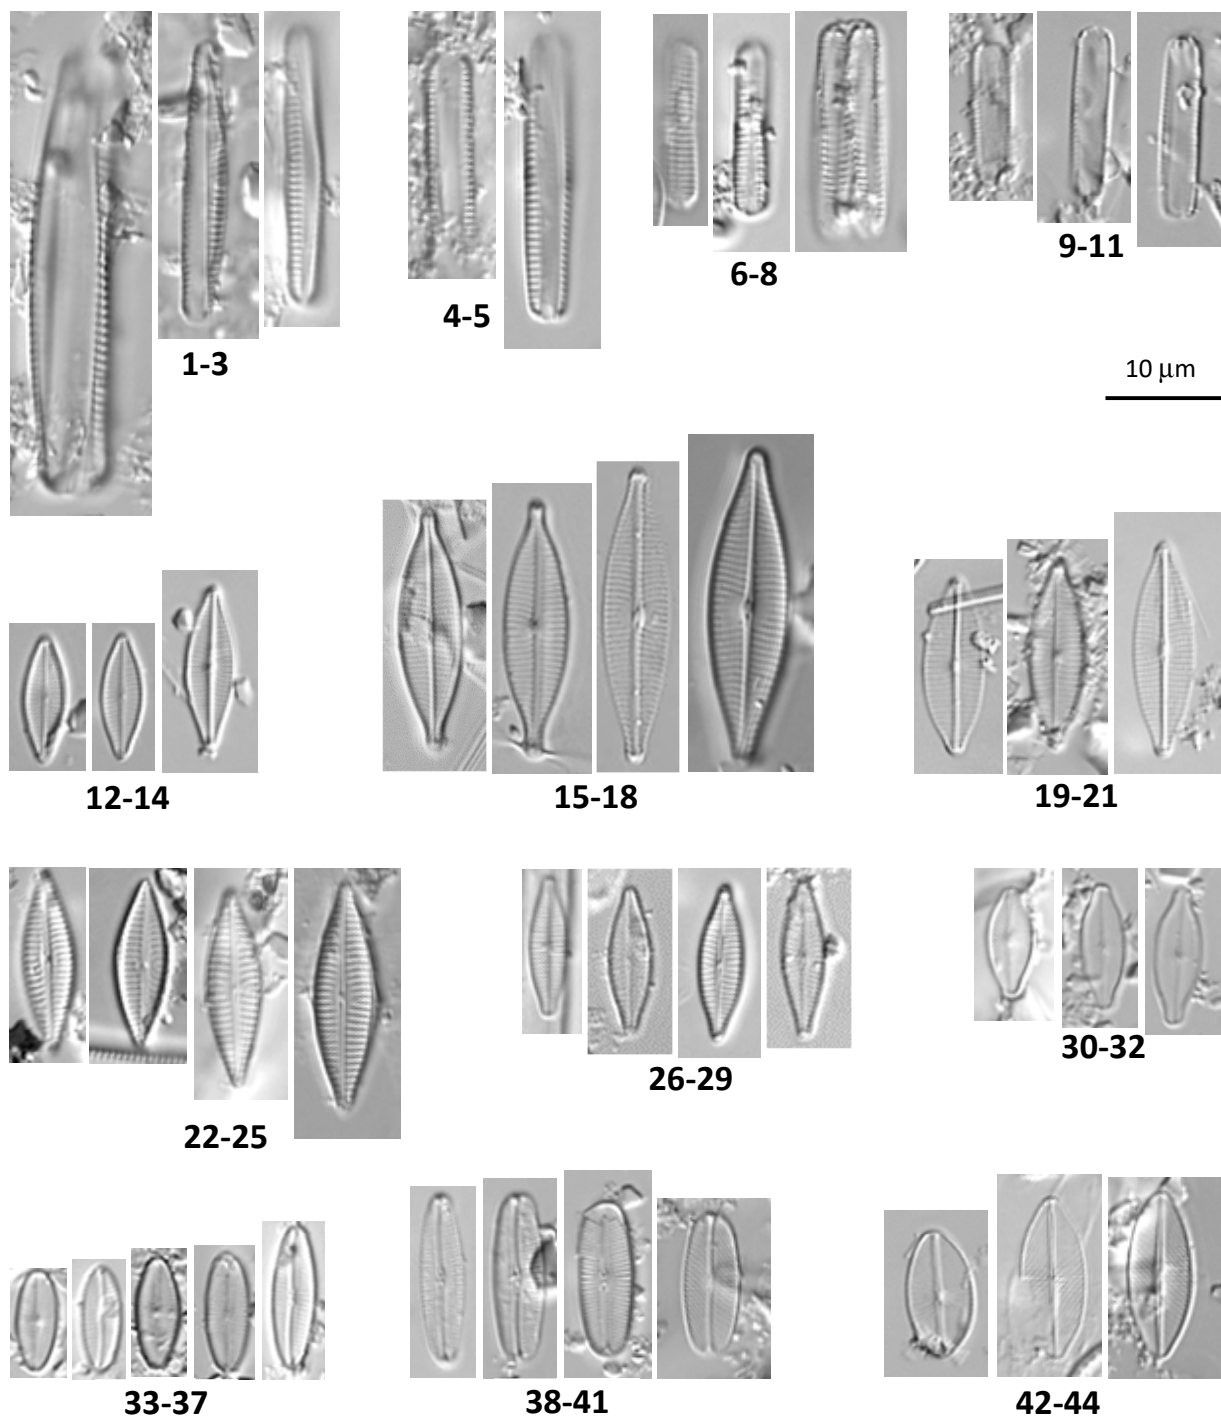

**Figure S12.** 1-3: Girdle view *Navicula* group 4. 4-5: Girdle view *Navicula* group 5. 6-8: Girdle view *Navicula* group 12. 9-11: Girdle view *Navicula* group 9. 12-14: *Navicula* sp.13. 15-18: *Navicula gregaria*. 19-21: *Navicula gregaria* shape 2. 22-25: *Navicula phyllepta* shape 2. 26-29: *Navicula phyllepta* shape 1. 30-32: *Navicula* sp. 285. 33-37: *Astartiella* sp. 149. 38-41: *Navicula* cf. *sublucidula*. 42-44: *Astartiella bremeyeri*.

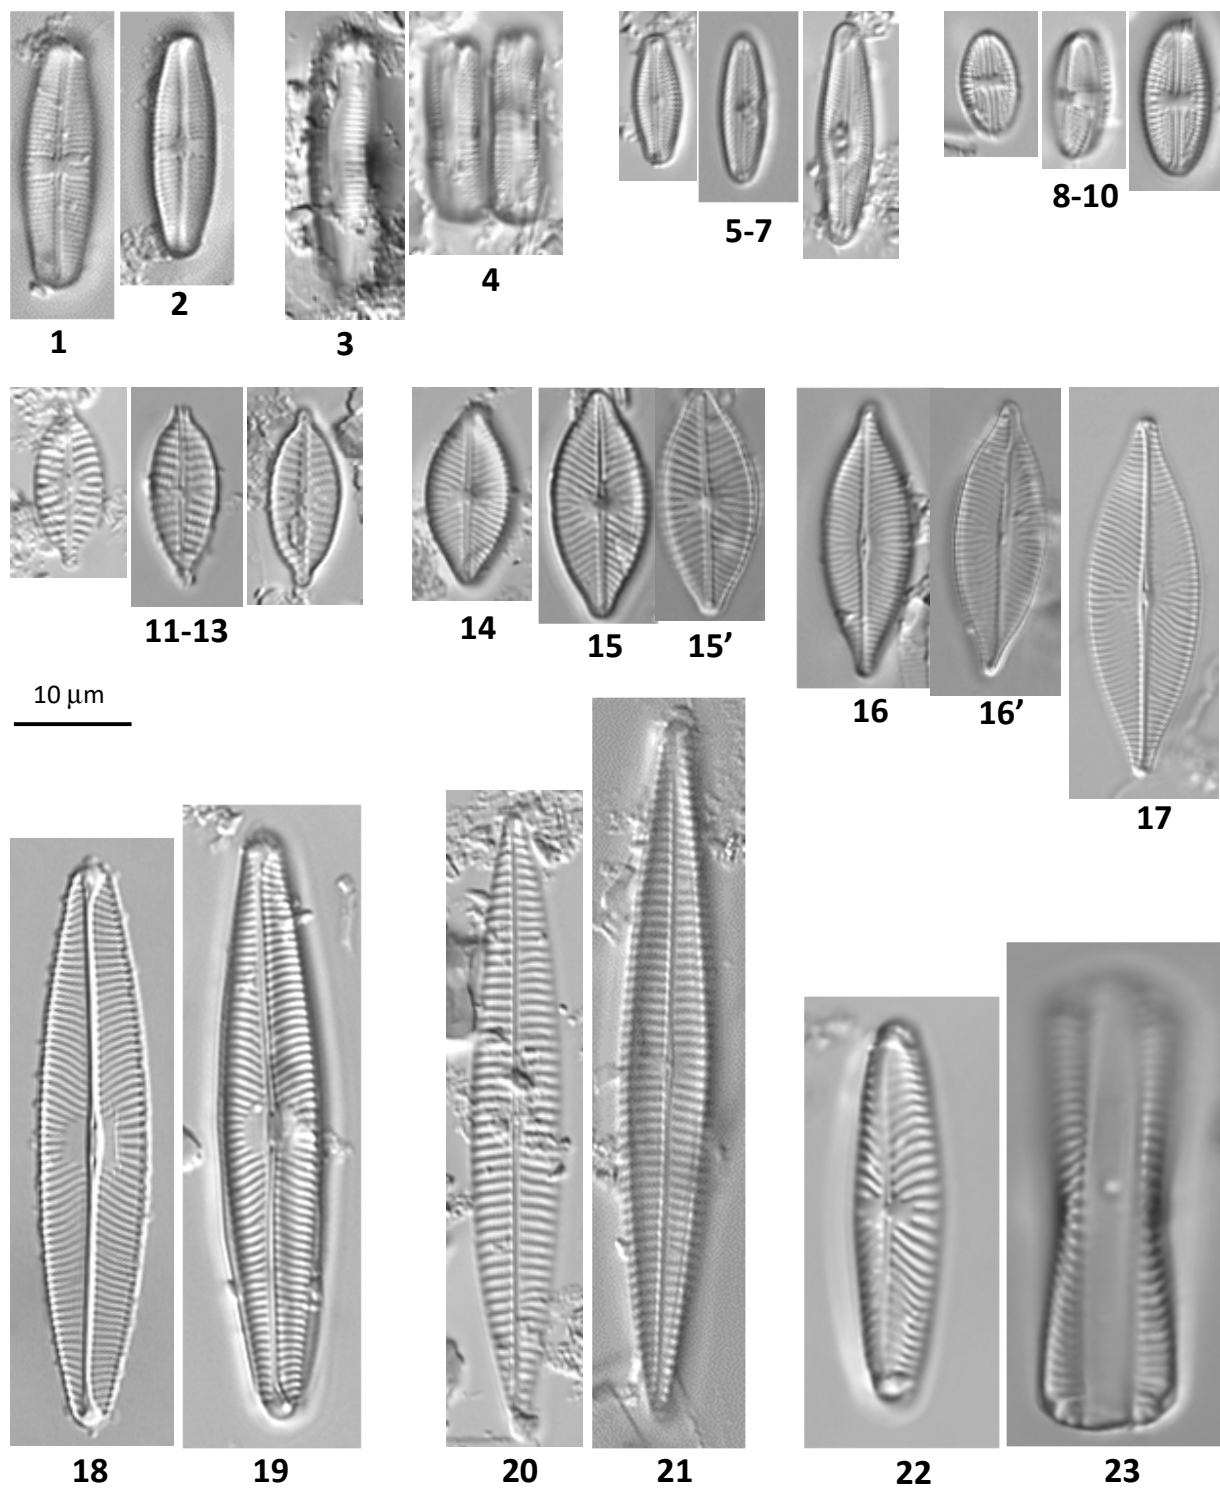

**Figure S13.** 1-2: *Dickieia subinflata*. 3-4: *Navicula* sp. 105. 5-7: *Navicula* aff. *subadnata*. 8-10: *Luticola mutica*. 11-13: *Navicula platyventris*. 14-15': *Placoneis clementis*. 16-17: *Navicula salinarum*. 18-19: *Navicula lanceolata*. 20-21: *Navicula directa*. 22-23: *Navicula* sp. 325.

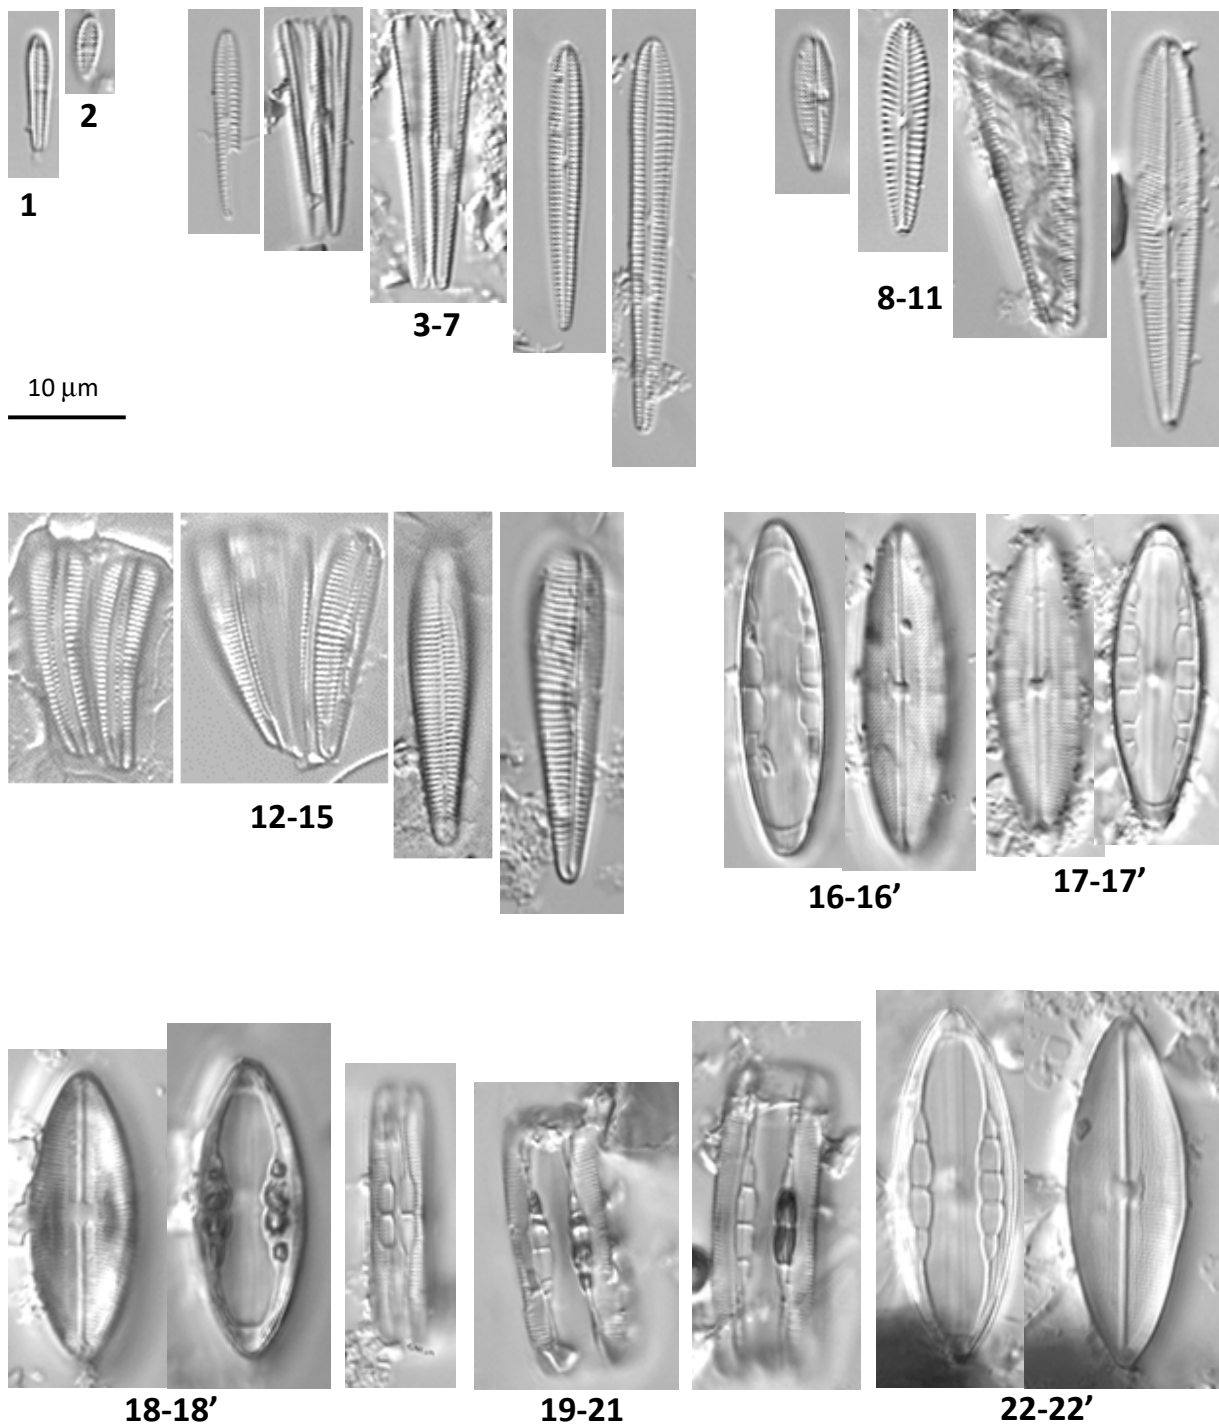

**Figure S14.** 1-2: *Gomphonemopsis pseudexigua*. 3-7: *Gomphonemopsis exigua*. 8-11: *Pseudogomphonema kamtschaticum*. 12-15: *Rhoicosphenia abbreviata*. 16-16': *Mastogloia* cf. *pumila*. 18-22': *Mastogloia exigua*.

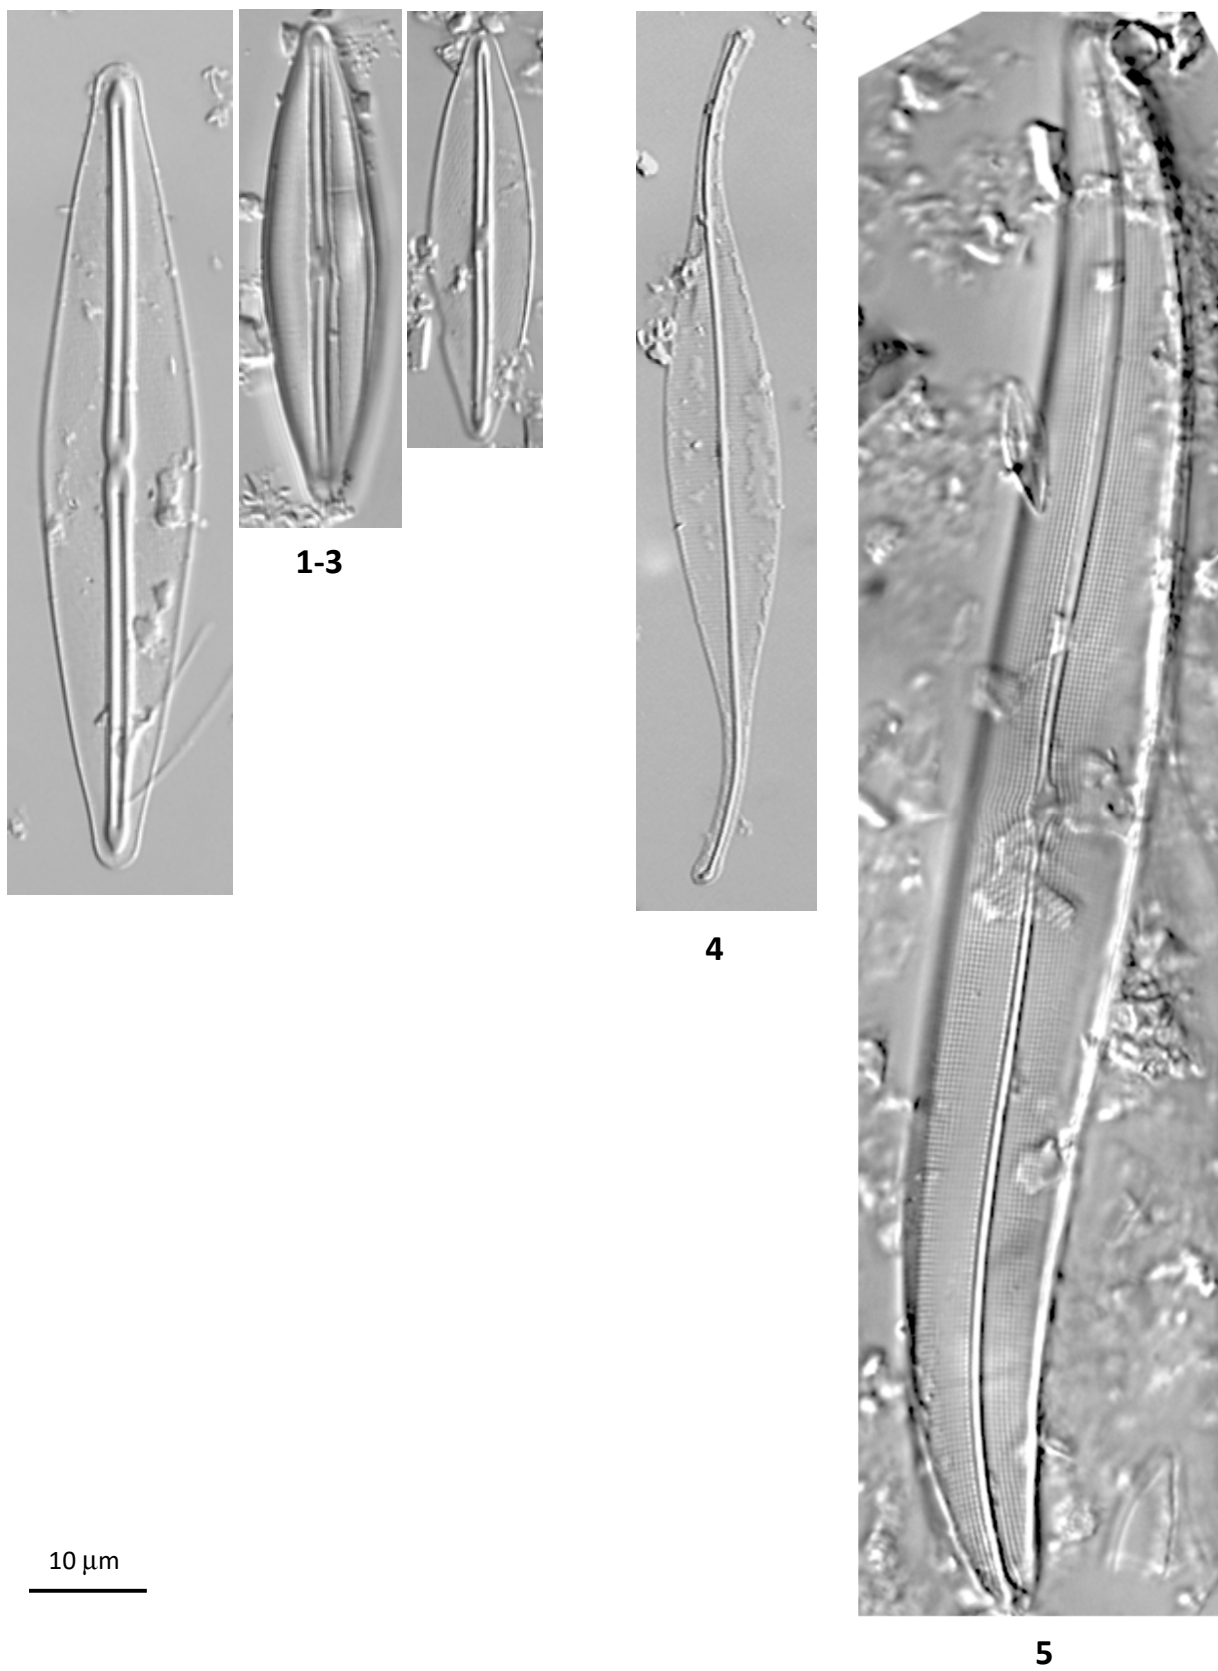

**Figure S15.** 1-3: *Frustulia saxonica*. 4: *Gyrosigma fasciola*. 5: *Gyrosigma acuminatum*.

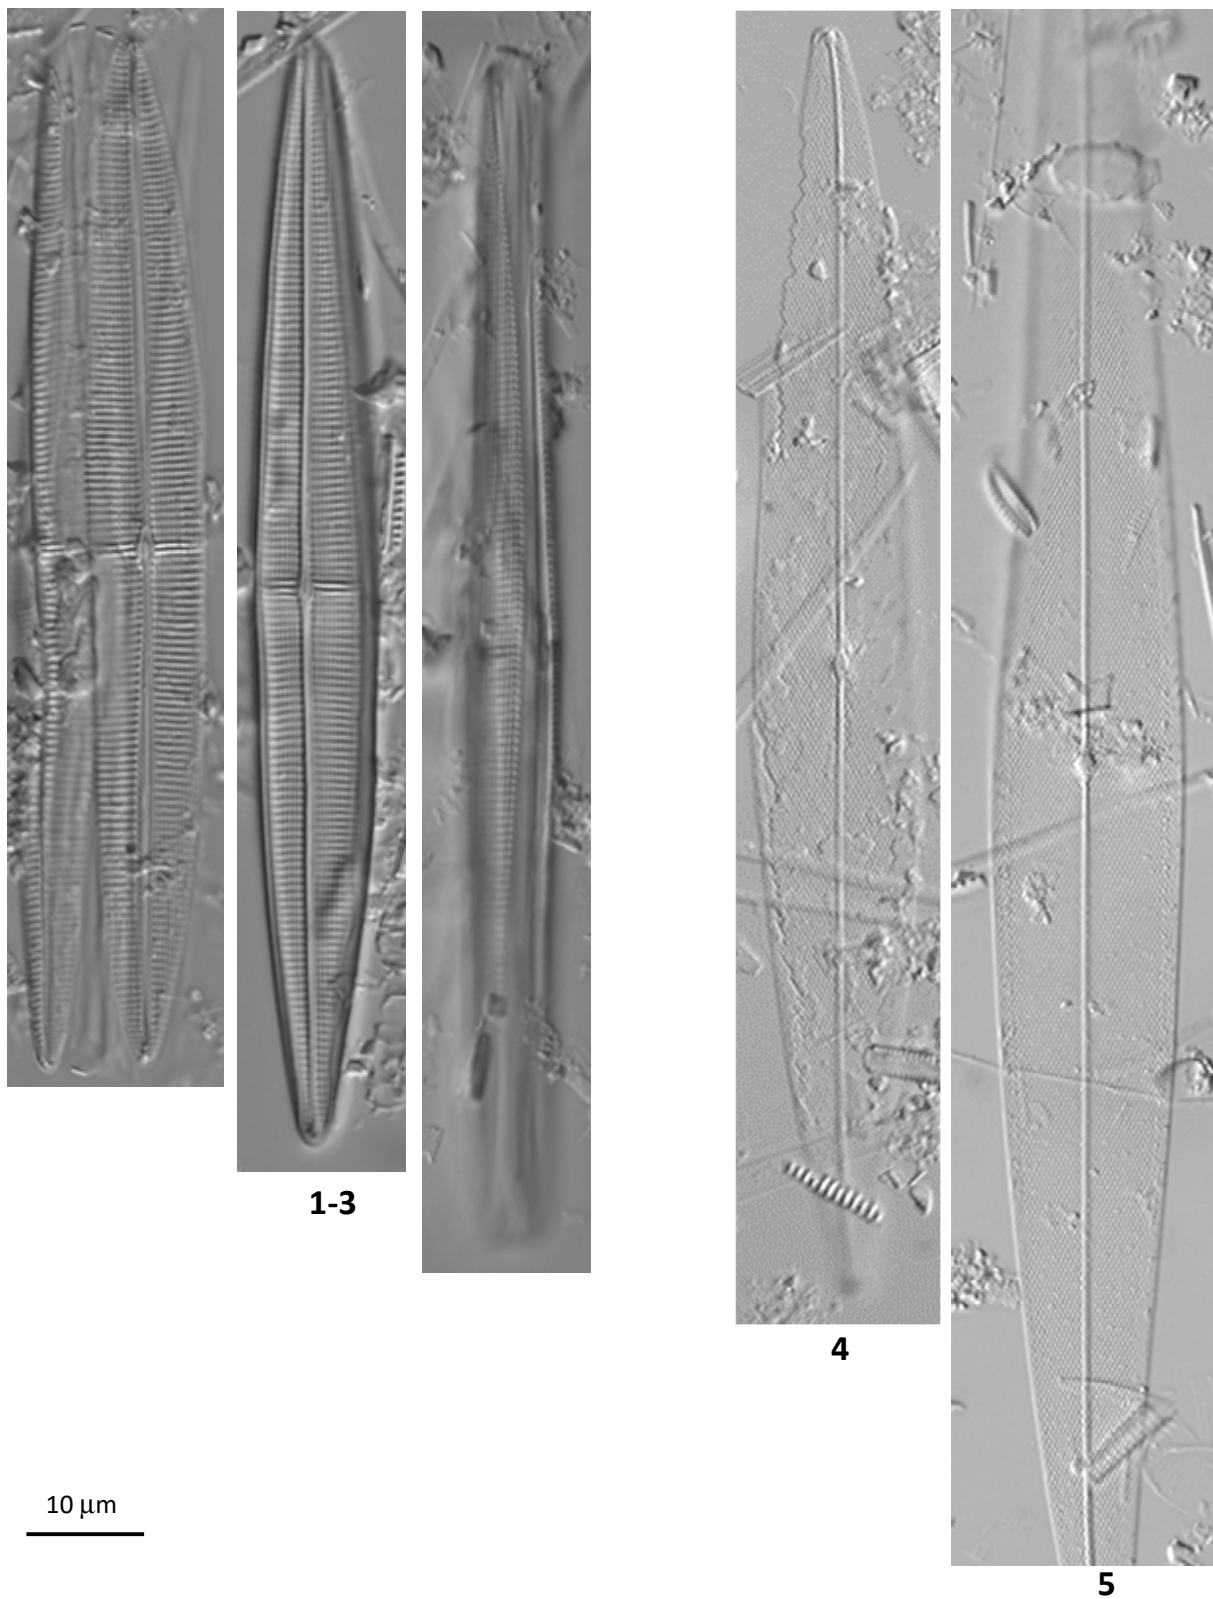

**Figure S16.** 1-3: *Haslea crucigera*. 4-5: *Pleurosigma intermedium*.



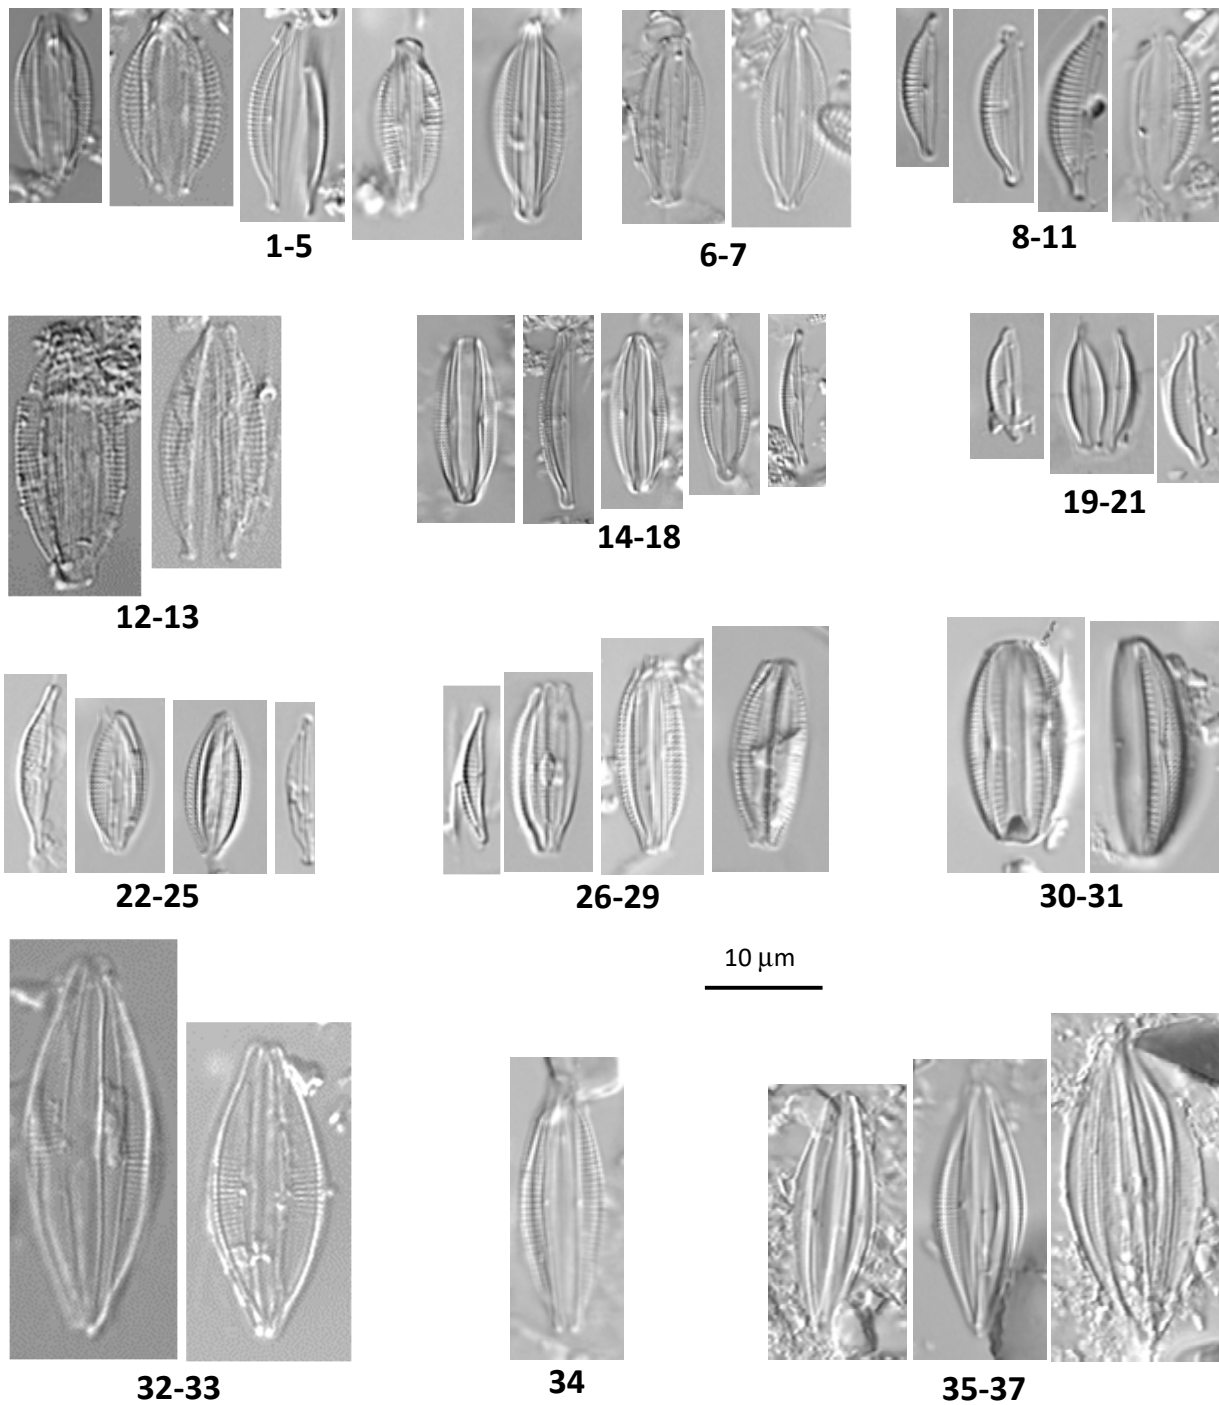

**Figure S17.** 1-5: *Amphora* sp. 8. 6-7: *Halamphora* sp. 39. 8-11: *Halamphora* cf. *tumida*. 12-13: *Amphora* sp. 7. 14-18: *Halamphora* cf. *obscura*. 19-21: *Halamphora* sp. 30. 22-25: *Halamphora* sp. 50. 26-29: *Halamphora* sp. 21. 30-31: *Amphora* cf. *inariensis*. 32-33: *Amphora* sp. 12. 34: *Halamphora* sp. 29. 35-37: *Halamphora* sp. 36.

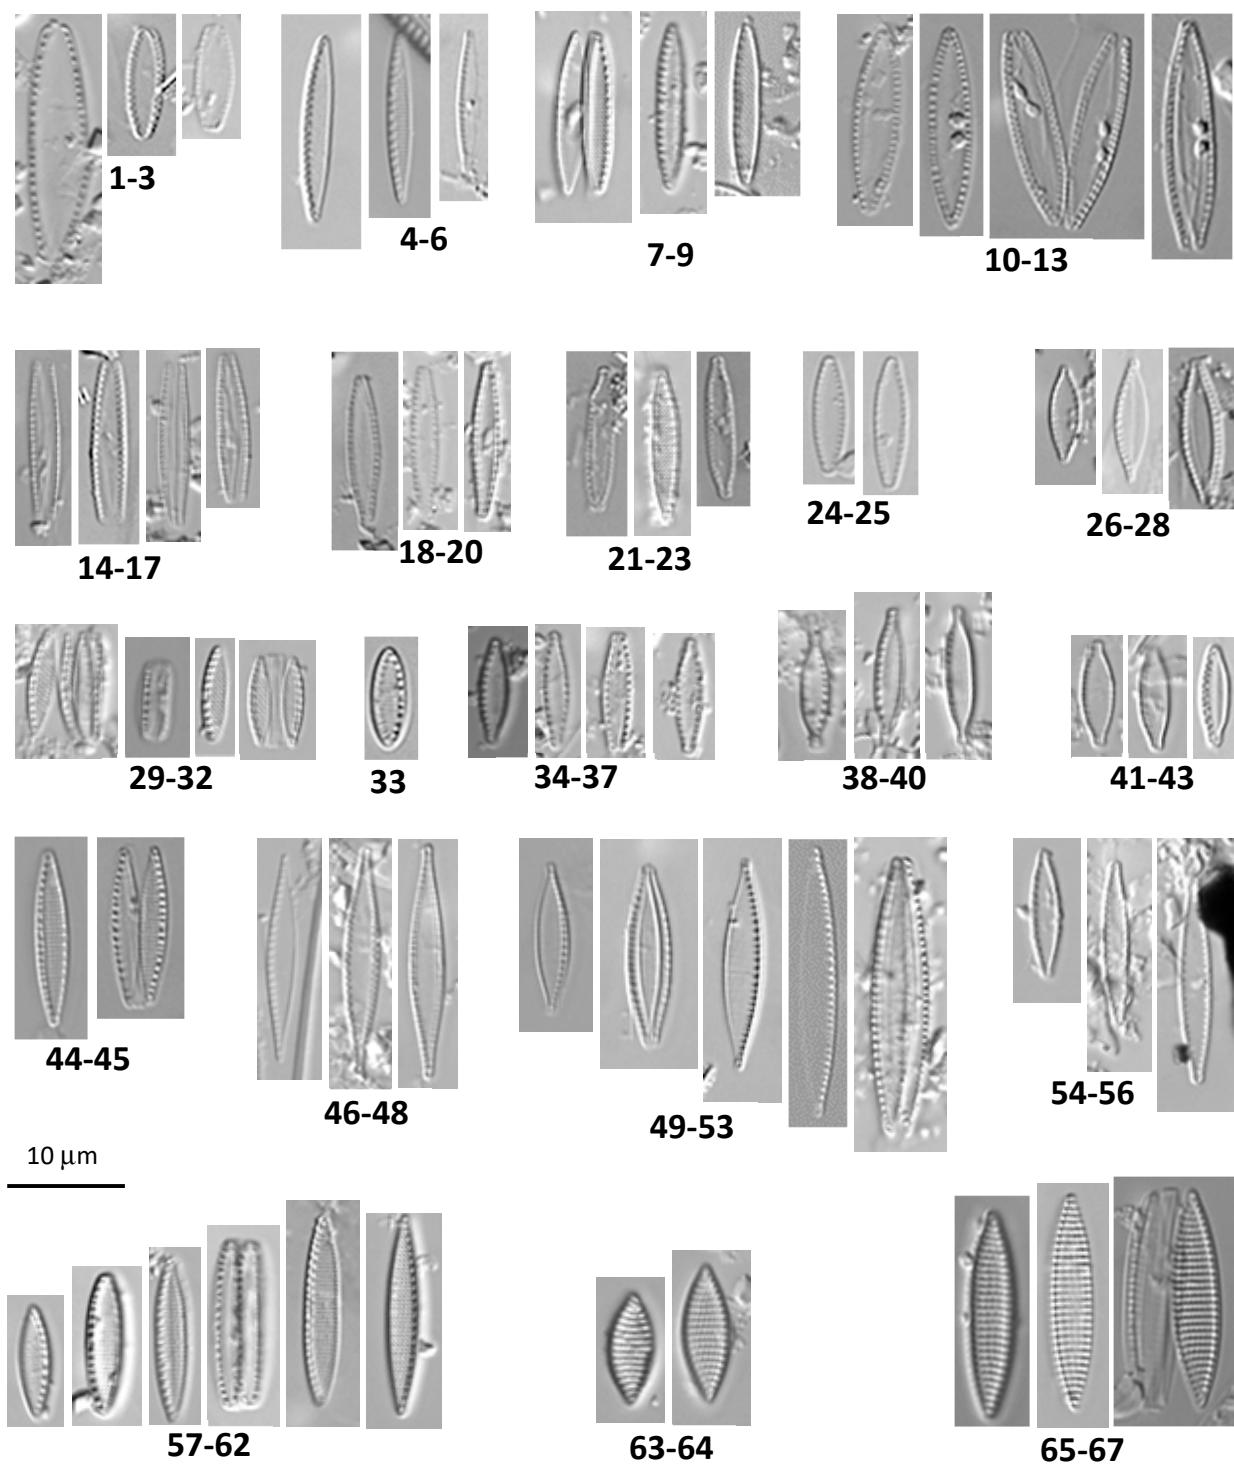

**Figure S18.** 1-3: *Nitzschia ovalis*. 4-6: *Nitzschia* sp. 140. 7-9: *Nitzschia* sp. 180. 10-13: *Nitzschia pusilla* shape 2. 14-17: *Nitzschia* sp. 30. 18-20: *Nitzschia* sp. 40. 21-23: *Nitzschia* sp. 5. 24-25: *Nitzschia pusilla* shape 1. 26-28: *Nitzschia* sp. 79. 29-32: *Nitzschia frustulum*. 33: *Nitzschia inconspicua*. 34-37: *Nitzschia* sp. 21. 38-40: *Nitzschia microcephala*. 41-43: *Nitzschia microcephala* shape 2. 44-45: *Nitzschia fonticola*. 46-48: *Nitzschia agnita*. 49-53: *Nitzschia palea*. 54-56: *Nitzschia* sp. 64. 57-62: *Nitzschia liebethuthii*. 63-64: *Tryblionella balatonis*. 65-67: *Tryblionella angustatula*.

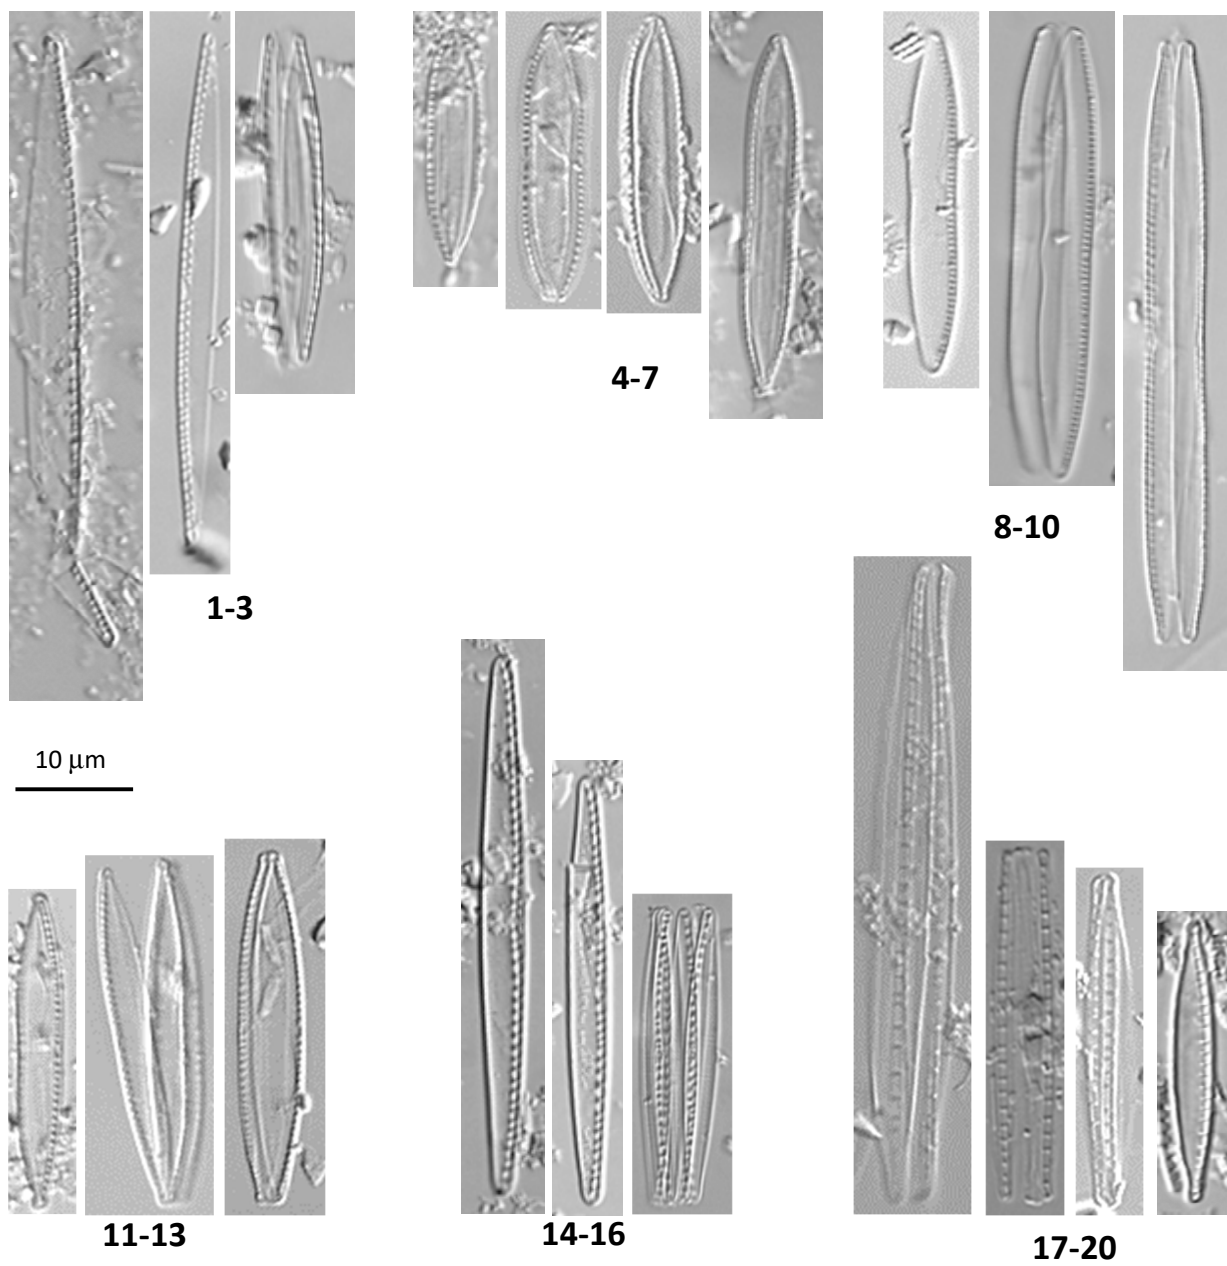

**Figure S19.** 1-3: *Nitzschia* sp. 178. 4-7: *Nitzschia capitellata*. 8-10: *Nitzschia thermaloides*. 11-13: *Nitzschia tubicola*. 14-16: *Nitzschia filiformis*. 17-20: *Nitzschia dissipata*.

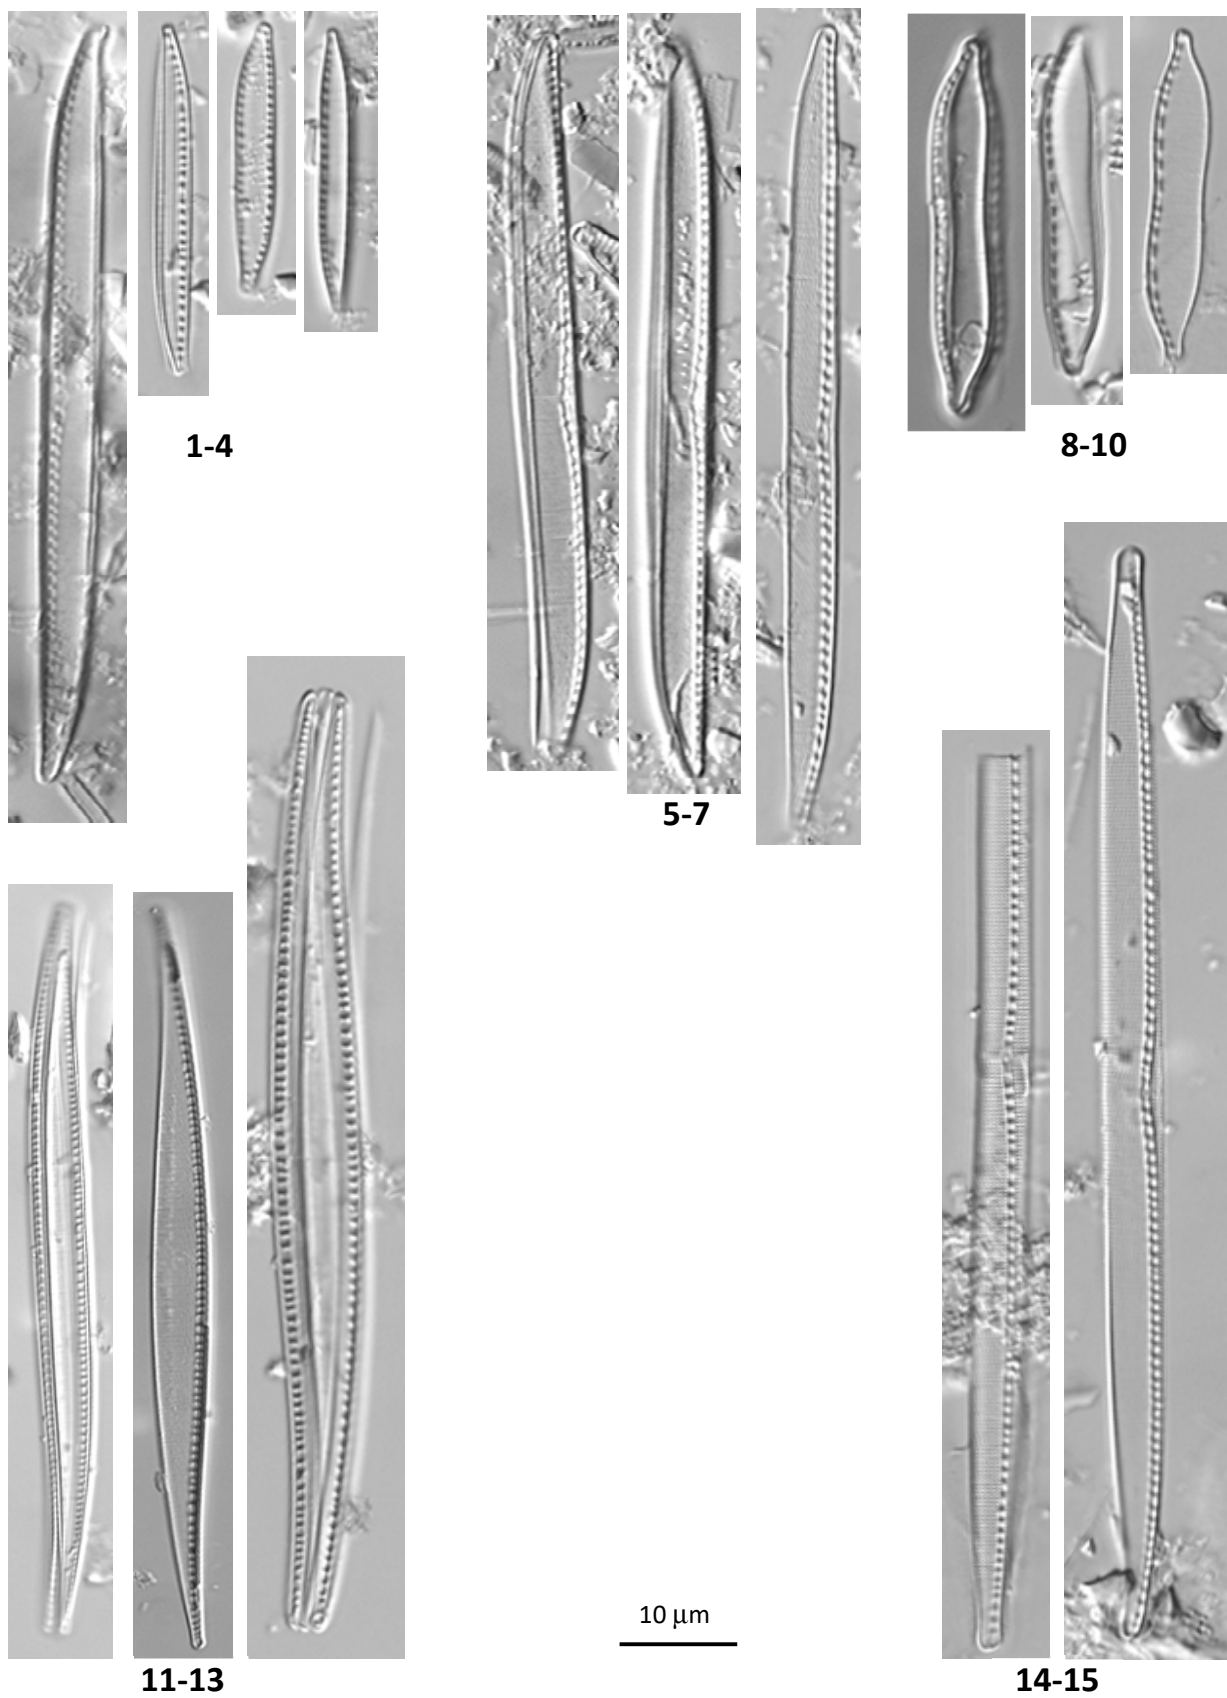

**Figure S20.** 1-4: *Nitzschia clausii*. 5-7: *Nitzschia cf. scalpelliformis*. 8-10: *Nitzschia brevissima*. 11-13: *Nitzschia sigma*. 14-15: *Nitzschia improvisa*.

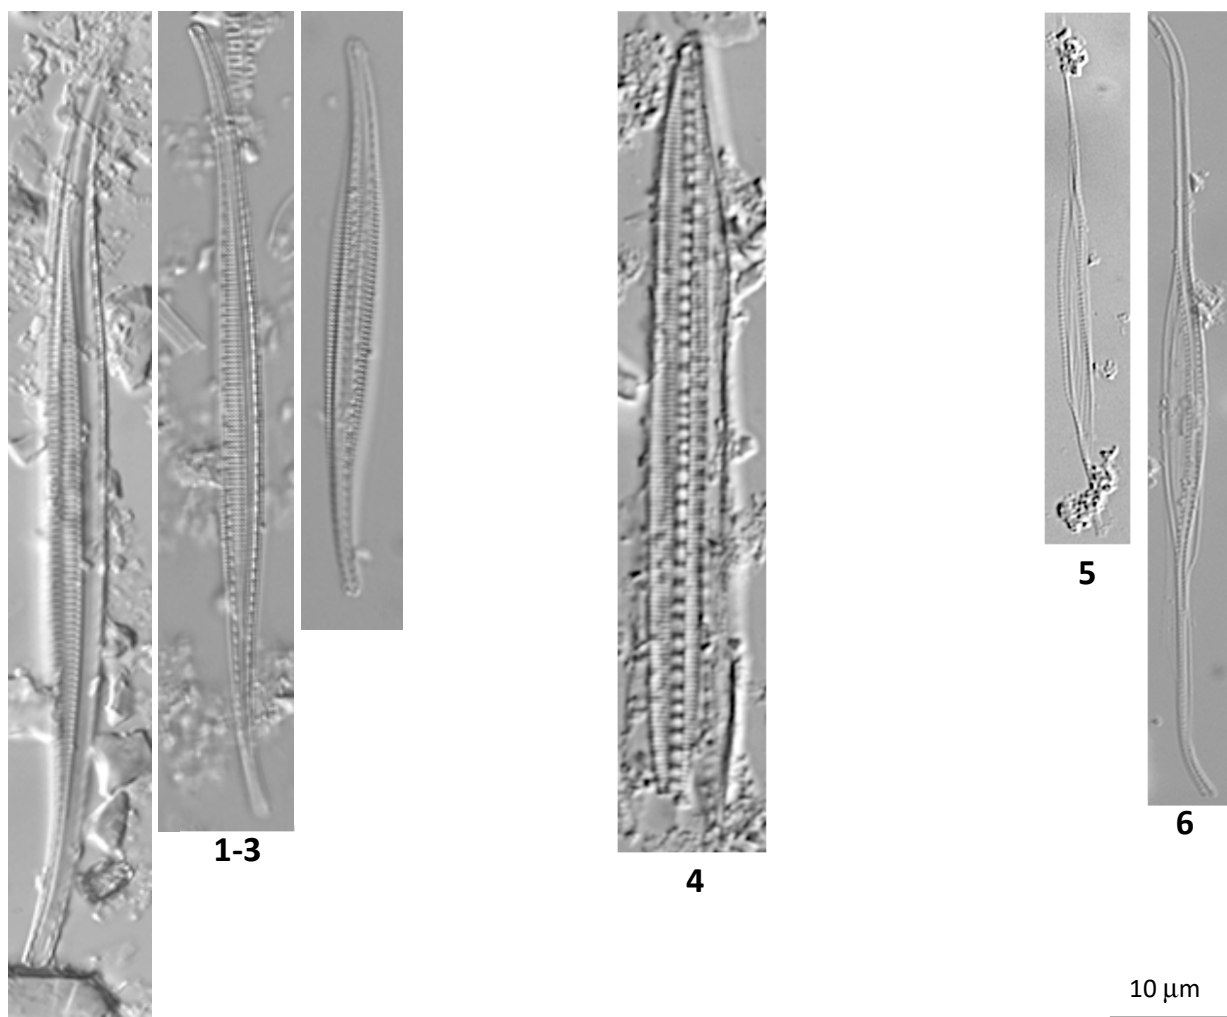

**Figure S21.** 1-3: *Nitzschia* sp. 88. 4: *Bacillaria paxillifera*. 5-6: *Nitzschia reversa*.

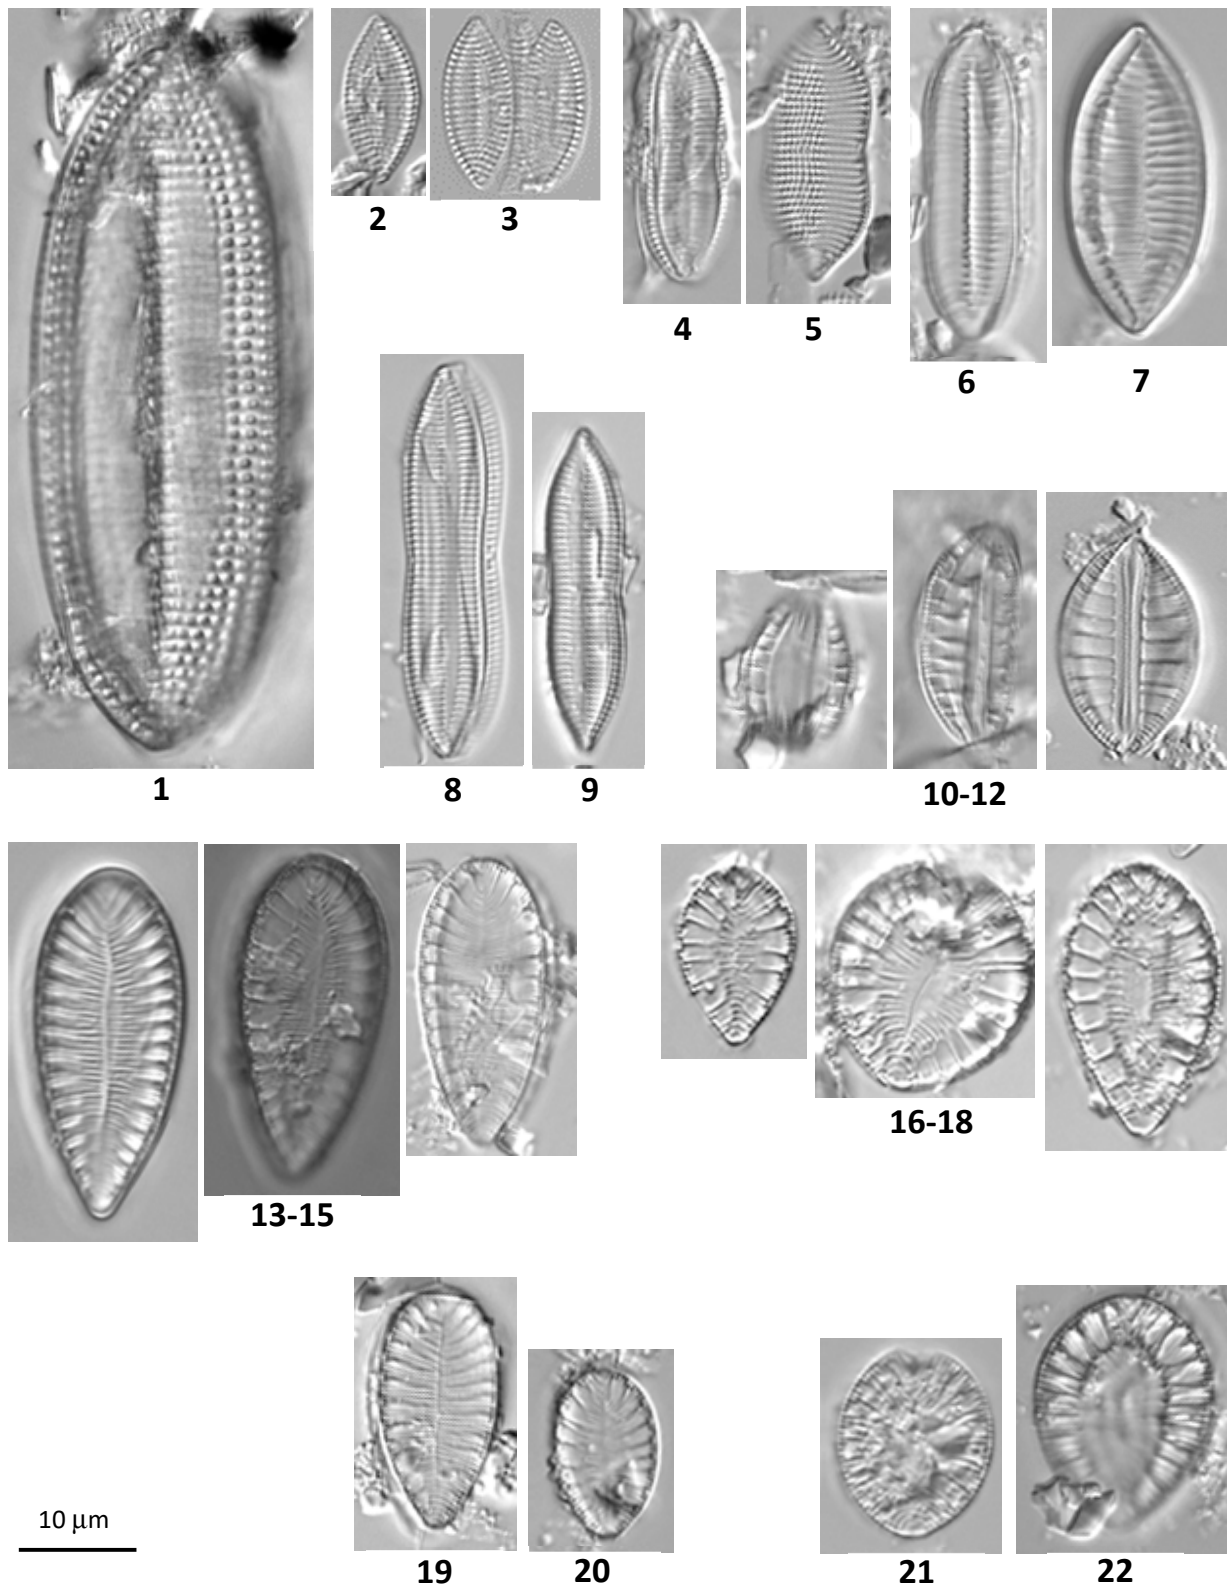

**Figure S22.** 1: *Tryblionella* sp. 1. 2-3: *Tryblionella punctata*. 4-5: *Tryblionella coarctata*. 6-7: *Tryblionella levidensis*. 8-9: *Tryblionella apiculata*. 10-12: *Rhopalodia brebissonii*. 13-15: *Surirella brebissonii*. 16-18: *Surirella brebissonii* var. *punctata*. 19-20: *Surirella brebissonii* var. *kuetzingii*. 21-22: *Surirella brightwellii*.

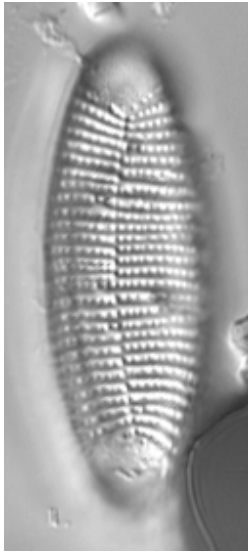

1

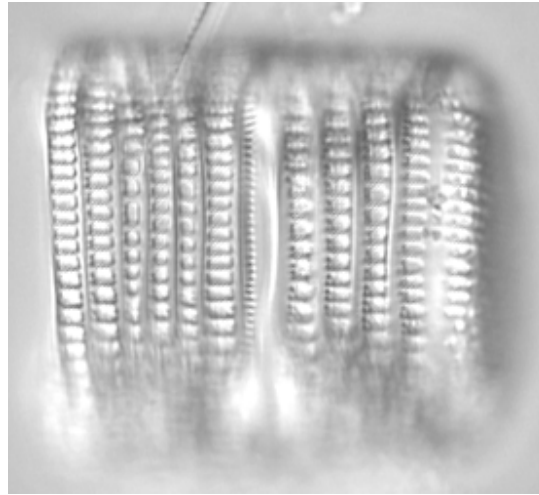

2

10  $\mu$ m

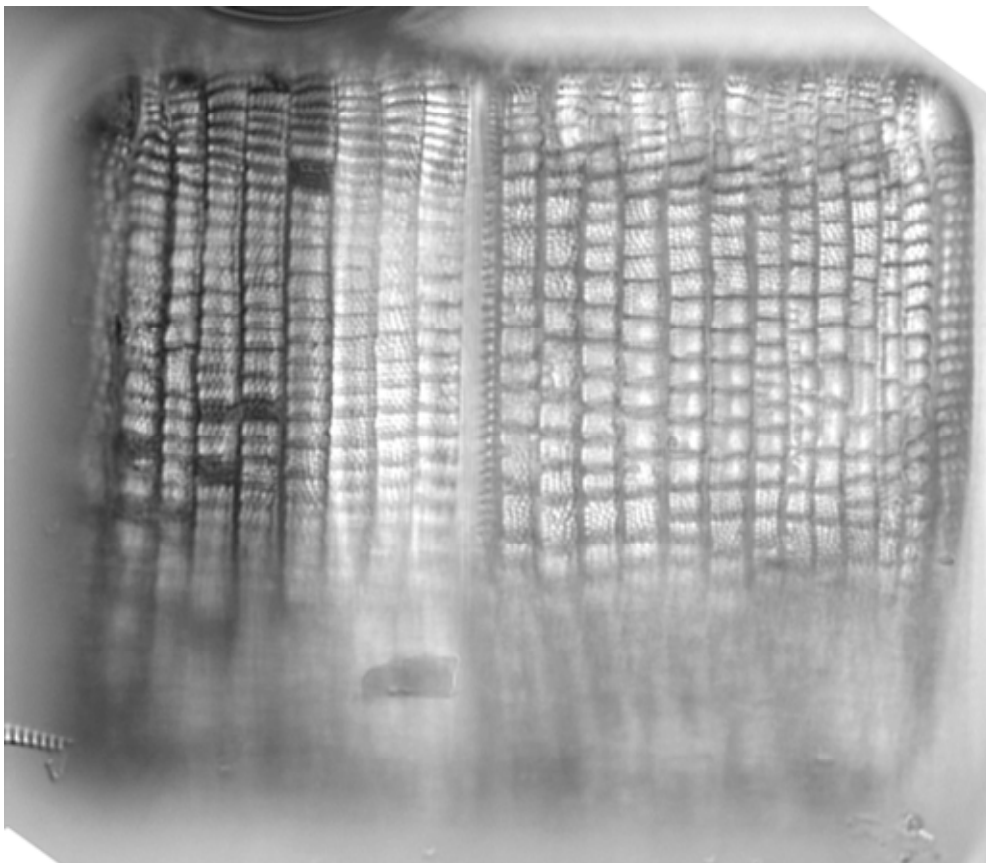

3

Figure S23. 1-3: *Rhabdonema arcuatum*.

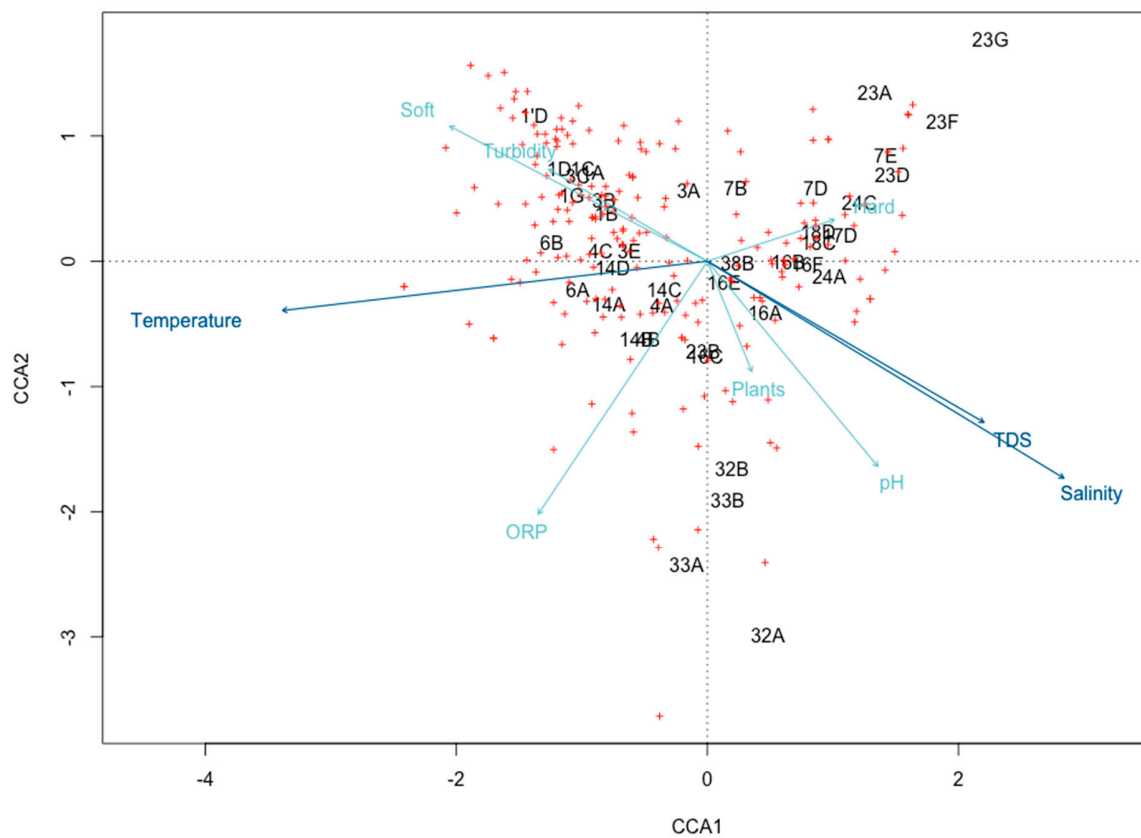

**Figure S24.** CCA showing the relationships between the environmental variables, different substrate types, sites and species with a relative abundance >1% (red cross). Variables represented by dark blue arrows are significant ( $p < 0.01$ ).
